# Supplementary material for: Multi-omics analyses reveal multimodal Fusobacterium DNA damage perturbations in colorectal cancer
Source: Research Square preprint supplement (doi:10.21203/rs.3.rs-1642872/v1), 2022-05-25
Supplement: Supplementary file 1 [file 2e399cb7cb71160c5a77301d.csv]

Supplementary Table 2: PFAM based Fusobacterium annotations in Shotgun Metagenomics data
PFAM Description	Total Reads	Sample Type	No. Samples
'Cold-shock' DNA-binding domain	17	Case	12
[2Fe-2S] binding domain	6	Case	6
1-deoxy-D-xylulose 5-phosphate reductoisomerase	22	Case	16
1-deoxy-D-xylulose-5-phosphate synthase	9	Case	5
2-C-methyl-D-erythritol 4-phosphate cytidylyltransferase	30	Case	17
2-hydroxycarboxylate transporter family	41	Case	19
2-hydroxyglutaryl-CoA dehydratase, D-component	77	Case	24
2-keto-3-deoxy-galactonokinase	7	Case	5
2-keto-3-deoxygluconate permease	12	Case	5
2-phosphosulpholactate phosphatase	4	Case	4
2Fe-2S iron-sulfur cluster binding domain	5	Case	4
3-beta hydroxysteroid dehydrogenase/isomerase family	57	Case	20
3-dehydroquinate synthase	32	Case	17
3-Deoxy-D-manno-octulosonic-acid transferase (kdotransferase)	11	Case	10
3-hydroxyacyl-CoA dehydrogenase, C-terminal domain	5	Case	5
3-hydroxyacyl-CoA dehydrogenase, NAD binding domain	23	Case	16
3-Oxoacyl-[acyl-carrier-protein (ACP)] synthase III	29	Case	13
3-Oxoacyl-[acyl-carrier-protein (ACP)] synthase III C terminal	2	Case	2
3,4-dihydroxy-2-butanone 4-phosphate synthase	3	Case	3
3' exoribonuclease family, domain 1	29	Case	19
3' exoribonuclease family, domain 2	5	Case	5
37-kD nucleoid-associated bacterial protein	3	Case	3
3D domain	1	Case	1
3H domain	4	Case	4
4-alpha-glucanotransferase	22	Case	18
4'-phosphopantetheinyl transferase superfamily	19	Case	15
4Fe-4S binding domain	43	Case	10
4Fe-4S dicluster domain	132	Case	32
4Fe-4S double cluster binding domain	22	Case	5
4Fe-4S iron sulfur cluster binding proteins, NifH/frxC family	5	Case	5
4Fe-4S single cluster domain	44	Case	17
5-formyltetrahydrofolate cyclo-ligase family	15	Case	13
5'-3' exonuclease, N-terminal resolvase-like domain	1	Case	1
5'-nucleotidase, C-terminal domain	1	Case	1
50S ribosome-binding GTPase	110	Case	24
5TM C-terminal transporter carbon starvation CstA	5	Case	5
5TMR of 5TMR-LYT	29	Case	21
6-O-methylguanine DNA methyltransferase, DNA binding domain	5	Case	4
6-O-methylguanine DNA methyltransferase, ribonuclease-like domain	14	Case	14
6-pyruvoyl tetrahydropterin synthase	1	Case	1
6,7-dimethyl-8-ribityllumazine synthase	27	Case	19
60Kd inner membrane protein	29	Case	17
7,8-dihydro-6-hydroxymethylpterin-pyrophosphokinase (HPPK)	24	Case	15
7TM receptor with intracellular HD hydrolase	22	Case	17
A nuclease family of the HNH/ENDO VII superfamily with conserved AHH	4	Case	4
AAA ATPase domain	19	Case	9
AAA domain	428	Case	47
AAA domain (Cdc48 subfamily)	9	Case	5
AAA domain (dynein-related subfamily)	71	Case	22
AAA domain, putative AbiEii toxin, Type IV TA system	282	Case	32
ABC 3 transport family	28	Case	15
ABC transporter	612	Case	51
ABC transporter C-terminal domain	5	Case	5
ABC transporter substrate binding protein	11	Case	5
ABC transporter transmembrane region	38	Case	20
ABC transporter, phosphonate, periplasmic substrate-binding protein	1	Case	1
ABC-2 type transporter	4	Case	4
ABC-type cobalt transport system, permease component	4	Case	4
ABC1 family	16	Case	16
AbgT putative transporter family	40	Case	11
Abi-like protein	6	Case	6
Acetamidase/Formamidase family	4	Case	4
Acetohydroxy acid isomeroreductase, catalytic domain	5	Case	5
Acetohydroxy acid isomeroreductase, NADPH-binding domain	5	Case	5
Acetokinase family	32	Case	19
Acetyl co-enzyme A carboxylase carboxyltransferase alpha subunit	4	Case	4
Acetyl-CoA hydrolase/transferase C-terminal domain	26	Case	16
Acetyl-CoA hydrolase/transferase N-terminal domain	7	Case	5
Acetyltransferase (GNAT) domain	121	Case	21
Acetyltransferase (GNAT) family	78	Case	17
Aconitase C-terminal domain	2	Case	2
Aconitase family (aconitate hydratase)	10	Case	7
AcrB/AcrD/AcrF family	83	Case	23
ACT domain	21	Case	7
ACT domain	4	Case	4
Actin	4	Case	4
Acyclic terpene utilisation family protein AtuA	9	Case	9
Acyl transferase domain	28	Case	21
Acyl-CoA dehydrogenase, C-terminal domain	71	Case	27
Acyl-CoA dehydrogenase, middle domain	37	Case	28
Acyl-CoA dehydrogenase, N-terminal domain	3	Case	3
Acyltransferase	36	Case	25
Acyltransferase family	20	Case	19
Adenine deaminase C-terminal domain	4	Case	4
Adenosylcobinamide amidohydrolase	1	Case	1
Adenylate and Guanylate cyclase catalytic domain	2	Case	2
Adenylate cyclase NT domain	12	Case	12
Adenylate kinase	1	Case	1
Adenylate kinase, active site lid	4	Case	4
Adenylosuccinate lyase C-terminus	24	Case	17
Adenylosuccinate synthetase	33	Case	19
Adhesion protein FadA	62	Case	19
AhpC/TSA antioxidant enzyme	4	Case	4
AhpC/TSA family	49	Case	16
AI-2E family transporter	27	Case	18
AICARFT/IMPCHase bienzyme	6	Case	6
AIG1 family	1	Case	1
AIR carboxylase	22	Case	14
AIR synthase related protein, C-terminal domain	35	Case	22
AIR synthase related protein, N-terminal domain	12	Case	8
Alanine dehydrogenase/PNT, C-terminal domain	5	Case	5
Alanine racemase, C-terminal domain	38	Case	18
Alanine racemase, N-terminal domain	37	Case	20
Alanine-glyoxylate amino-transferase	6	Case	6
Alcohol dehydrogenase GroES-like domain	7	Case	6
Aldehyde dehydrogenase family	119	Case	26
Aldehyde oxidase and xanthine dehydrogenase, a/b hammerhead domain	5	Case	5
Aldo/keto reductase family	22	Case	9
Aldose 1-epimerase	25	Case	16
Alkaline phosphatase	8	Case	4
Alpha amylase, C-terminal all-beta domain	4	Case	4
Alpha amylase, catalytic domain	44	Case	20
Alpha-2-macroglobulin family	3	Case	3
Alpha/beta hydrolase family	5	Case	5
alpha/beta hydrolase fold	47	Case	18
Amidase	36	Case	26
Amidinotransferase	19	Case	15
Amidohydrolase	12	Case	12
Amidohydrolase family	177	Case	31
AMIN domain	3	Case	3
Amino acid kinase family	45	Case	21
Amino acid permease	56	Case	19
Amino-transferase class IV	37	Case	15
Aminoacyl tRNA synthetase class II, N-terminal domain	23	Case	21
Aminoacyl-tRNA editing domain	86	Case	26
Aminopeptidase I zinc metalloprotease (M18)	25	Case	17
Aminopeptidase P, N-terminal domain	23	Case	18
Aminotransferase class I and II	157	Case	28
Aminotransferase class-III	50	Case	20
Aminotransferase class-V	64	Case	18
AMP-binding enzyme	29	Case	23
Anaerobic ribonucleoside-triphosphate reductase	10	Case	10
Anaphase-promoting complex subunit 4 WD40 domain	11	Case	11
Anaphase-promoting complex, cyclosome, subunit 3	16	Case	7
Anion-transporting ATPase	30	Case	17
Ankyrin repeat	30	Case	12
Ankyrin repeats (many copies)	6	Case	4
ANTAR domain	4	Case	4
Anthranilate synthase component I, N terminal region	30	Case	20
Antibiotic biosynthesis monooxygenase	21	Case	15
Anticodon binding domain	6	Case	4
Anticodon-binding domain of tRNA	13	Case	11
Antitoxin Phd_YefM, type II toxin-antitoxin system	24	Case	14
AP endonuclease family 2 C terminus	4	Case	4
ApbE family	28	Case	16
Apo-citrate lyase phosphoribosyl-dephospho-CoA transferase	15	Case	12
Apocytochrome F, C-terminal	1	Case	1
Apolipoprotein A1/A4/E domain	13	Case	13
Archaea bacterial proteins of unknown function	7	Case	7
Arginase family	48	Case	22
Argininosuccinate lyase C-terminal	4	Case	4
Arginosuccinate synthase	11	Case	9
Arginyl tRNA synthetase N terminal domain	8	Case	5
Aromatic amino acid lyase	38	Case	21
ArsC family	12	Case	12
Arylsulfotransferase (ASST)	4	Case	4
Arylsulfotransferase Ig-like domain	5	Case	4
AsmA-like C-terminal region	4	Case	4
Asp/Glu/Hydantoin racemase	72	Case	22
Asp23 family, cell envelope-related function	25	Case	15
Asparaginase	4	Case	4
Asparaginase, N-terminal	22	Case	17
Asparagine synthase	36	Case	21
Aspartate-ammonia ligase	21	Case	16
Aspartate/ornithine carbamoyltransferase, Asp/Orn binding domain	18	Case	15
Aspartate/ornithine carbamoyltransferase, carbamoyl-P binding domain	7	Case	6
ATP cone domain	57	Case	21
ATP synthase	17	Case	15
ATP synthase (C/AC39) subunit	18	Case	17
ATP synthase (E/31 kDa) subunit	17	Case	16
ATP synthase (F/14-kDa) subunit	17	Case	15
ATP synthase A chain	15	Case	15
ATP synthase alpha/beta chain, C terminal domain	4	Case	4
ATP synthase alpha/beta family, beta-barrel domain	38	Case	26
ATP synthase alpha/beta family, nucleotide-binding domain	123	Case	32
ATP synthase B/B' CF(0)	16	Case	14
ATP synthase delta (OSCP) subunit	21	Case	15
ATP synthase subunit C	47	Case	18
ATP synthase subunit D	18	Case	13
ATP synthase, Delta/Epsilon chain, beta-sandwich domain	14	Case	13
ATP-dependent protease La (LON) substrate-binding domain	3	Case	3
ATP-grasp domain	16	Case	7
ATP-grasp in the biosynthetic pathway with Ter operon	4	Case	4
ATP-NAD kinase	21	Case	15
ATP:corrinoid adenosyltransferase BtuR/CobO/CobP	21	Case	18
ATP:dephospho-CoA triphosphoribosyl transferase	21	Case	16
ATPase family associated with various cellular activities (AAA)	63	Case	23
ATPase MipZ	14	Case	12
Autotransporter beta-domain	294	Case	33
AzlC protein	22	Case	13
B12 binding domain	56	Case	22
B3/4 domain	6	Case	5
Bacitracin resistance protein BacA	21	Case	17
Bacterial capsule synthesis protein PGA_cap	3	Case	3
Bacterial conjugation TrbI-like protein	1	Case	1
Bacterial DNA polymerase III alpha NTPase domain	47	Case	18
Bacterial DNA-binding protein	121	Case	13
Bacterial dnaA protein helix-turn-helix	3	Case	3
Bacterial export proteins, family 1	2	Case	2
Bacterial extracellular solute-binding protein	130	Case	31
Bacterial extracellular solute-binding protein, family 7	52	Case	21
Bacterial extracellular solute-binding proteins, family 3	80	Case	24
Bacterial extracellular solute-binding proteins, family 5 Middle	273	Case	33
Bacterial fructose-1,6-bisphosphatase, glpX-encoded	24	Case	17
Bacterial lipid A biosynthesis acyltransferase	29	Case	18
Bacterial Na+/H+ antiporter B (NhaB)	4	Case	4
Bacterial protein of unknown function (DUF896)	10	Case	9
Bacterial regulatory helix-turn-helix protein, lysR family	30	Case	10
Bacterial regulatory helix-turn-helix proteins, AraC family	5	Case	4
Bacterial regulatory protein, arsR family	1	Case	1
Bacterial regulatory protein, Fis family	42	Case	20
Bacterial regulatory proteins, crp family	16	Case	13
Bacterial regulatory proteins, gntR family	75	Case	20
Bacterial regulatory proteins, lacI family	4	Case	4
Bacterial regulatory proteins, luxR family	1	Case	1
Bacterial regulatory proteins, tetR family	35	Case	16
Bacterial RNA polymerase, alpha chain C terminal domain	8	Case	4
Bacterial SH3 domain	25	Case	14
Bacterial sugar transferase	11	Case	5
Bacterial toxin 50	15	Case	14
Bacterial transcriptional activator domain	4	Case	4
Bacterial transcriptional regulator	17	Case	5
Bacterial transferase hexapeptide (six repeats)	38	Case	12
Bacterial trigger factor protein (TF)	25	Case	17
Bacterial trigger factor protein (TF) C-terminus	5	Case	5
Bacterial type II and III secretion system protein	24	Case	19
BadF/BadG/BcrA/BcrD ATPase family	75	Case	26
Barrel-sandwich domain of CusB or HlyD membrane-fusion	24	Case	17
Beta-eliminating lyase	102	Case	31
beta-keto acid cleavage enzyme	45	Case	18
Beta-ketoacyl synthase, C-terminal domain	31	Case	21
Beta-ketoacyl synthase, N-terminal domain	12	Case	7
Beta-lactamase enzyme family	35	Case	17
Beta-lactamase superfamily domain	36	Case	15
Binding-protein-dependent transport system inner membrane component	496	Case	38
Biopolymer transport protein ExbD/TolR	41	Case	16
Biotin and Thiamin Synthesis associated domain	1	Case	1
Biotin carboxylase C-terminal domain	1	Case	1
Biotin-lipoyl like	51	Case	24
Biotin-requiring enzyme	40	Case	23
Biotin/lipoate A/B protein ligase family	29	Case	16
BioY family	4	Case	4
BMC domain	142	Case	24
Branched-chain amino acid ATP-binding cassette transporter	20	Case	15
Branched-chain amino acid transport protein	62	Case	23
Branched-chain amino acid transport protein (AzlD)	17	Case	10
Branched-chain amino acid transport system / permease component	154	Case	31
BRCA1 C Terminus (BRCT) domain	3	Case	3
BRO family, N-terminal domain	1	Case	1
BspA type Leucine rich repeat region (6 copies)	34	Case	15
C-5 cytosine-specific DNA methylase	1	Case	1
C-C_Bond_Lyase of the TIM-Barrel fold	9	Case	4
C-terminal domain of 1-Cys peroxiredoxin	17	Case	10
C-terminal, D2-small domain, of ClpB protein	15	Case	10
C4-dicarboxylate anaerobic carrier	142	Case	28
Cache domain	8	Case	8
Calcineurin-like phosphoesterase	31	Case	17
Calcineurin-like phosphoesterase superfamily domain	28	Case	18
Capsular polysaccharide synthesis protein	5	Case	4
Capsule biosynthesis CapC	5	Case	5
Carbamoyl-phosphate synthase L chain, ATP binding domain	23	Case	18
Carbamoyl-phosphate synthase small chain, CPSase domain	27	Case	16
Carbamoyl-phosphate synthetase large chain, oligomerisation domain	10	Case	10
Carbamoyltransferase N-terminus	11	Case	7
Carbohydrate kinase	1	Case	1
Carbohydrate phosphorylase	40	Case	22
Carbohydrate-binding module 48 (Isoamylase N-terminal domain)	1	Case	1
Carbon starvation protein CstA	34	Case	21
Carbon-nitrogen hydrolase	16	Case	4
Carbonic anhydrase	5	Case	5
Carboxyl transferase domain	78	Case	24
Carboxyltransferase domain, subdomain A and B	36	Case	14
Carboxyltransferase domain, subdomain C and D	21	Case	14
CarboxypepD_reg-like domain	4	Case	4
Carboxypeptidase Taq (M32) metallopeptidase	29	Case	18
CarD-like/TRCF domain	22	Case	20
Cation efflux family	3	Case	3
Cation transport ATPase (P-type)	3	Case	3
Cation transport protein	53	Case	24
Cation transporter/ATPase, N-terminus	21	Case	20
Cation transporting ATPase, C-terminus	7	Case	4
CbiD	35	Case	16
CBS domain	119	Case	28
CDP-alcohol phosphatidyltransferase	43	Case	16
Cell cycle protein	44	Case	19
Cell division protein FtsA	25	Case	19
Cell division protein FtsQ	6	Case	6
Cell division protein SepF	36	Case	18
Cell envelope-related transcriptional attenuator domain	2	Case	2
Cellulose biosynthesis protein BcsQ	3	Case	3
CGGC domain	6	Case	4
Chain length determinant protein	4	Case	4
CHAP domain	3	Case	3
Chaperone of endosialidase	1	Case	1
Chaperonin 10 Kd subunit	19	Case	15
CHC2 zinc finger	4	Case	4
Chlamydia polymorphic membrane protein (Chlamydia_PMP) repeat	3	Case	3
Chloramphenicol acetyltransferase	4	Case	4
chorismate binding enzyme	17	Case	15
Chorismate mutase type II	12	Case	10
Chorismate synthase	29	Case	16
Chromate transporter	43	Case	17
Citrate lyase ligase C-terminal domain	12	Case	8
Citrate lyase, alpha subunit (CitF)	45	Case	24
Citrate transporter	53	Case	20
Class II Aldolase and Adducin N-terminal domain	14	Case	10
Class II release factor RF3, C-terminal domain	21	Case	20
Clp amino terminal domain, pathogenicity island component	5	Case	5
Clp protease	61	Case	23
CO dehydrogenase flavoprotein C-terminal domain	6	Case	5
CoA binding domain	2	Case	2
CoA enzyme activase uncharacterised domain (DUF2229)	17	Case	16
CoA-binding domain	16	Case	9
CoA-transferase family III	6	Case	6
Cobalamin adenosyltransferase	28	Case	19
Cobalamin synthesis G C-terminus	7	Case	6
Cobalamin synthesis protein cobW C-terminal domain	14	Case	14
Cobalamin-5-phosphate synthase	21	Case	13
Cobalamin-independent synthase, Catalytic domain	1	Case	1
Cobalt chelatase (CbiK)	23	Case	16
Cobalt transport protein	11	Case	7
CobB/CobQ-like glutamine amidotransferase domain	55	Case	27
CobD/Cbib protein	22	Case	15
Cobinamide kinase / cobinamide phosphate guanyltransferase	19	Case	13
CobN/Magnesium Chelatase	1	Case	1
CobQ/CobB/MinD/ParA nucleotide binding domain	67	Case	20
CobW/HypB/UreG, nucleotide-binding domain	32	Case	18
Coenzyme A transferase	105	Case	27
Coiled stalk of trimeric autotransporter adhesin	24	Case	13
Colicin V production protein	16	Case	14
Collagenase	23	Case	18
Competence protein	25	Case	13
Conserved carboxylase domain	25	Case	16
Conserved hypothetical protein 698	19	Case	15
Conserved hypothetical protein 95	18	Case	12
Conserved region in glutamate synthase	8	Case	8
CorA-like Mg2+ transporter protein	24	Case	18
CPBP intramembrane metalloprotease	5	Case	5
Creatinase/Prolidase N-terminal domain	27	Case	18
CRISPR associated protein Cas1	14	Case	14
CRISPR associated protein Cas2	9	Case	9
CRISPR associated protein Cas6	1	Case	1
CRISPR-associated endoribonuclease Cas6	8	Case	8
CRISPR-associated negative auto-regulator DevR/Csa2	4	Case	4
CRISPR-associated protein (Cas_APE2256)	4	Case	4
CRISPR-associated protein Cas7	14	Case	14
Cro/C1-type HTH DNA-binding domain	1	Case	1
Crossover junction endodeoxyribonuclease RuvC	18	Case	14
Crp-like helix-turn-helix domain	33	Case	19
CRS1 / YhbY (CRM) domain	18	Case	13
CTP synthase N-terminus	5	Case	5
Cupin domain	41	Case	18
Curli production assembly/transport component CsgG	4	Case	4
CutC family	36	Case	13
Cyclic nucleotide-binding domain	25	Case	17
Cyclin M transmembrane N-terminal domain	7	Case	7
Cyclophilin type peptidyl-prolyl cis-trans isomerase/CLD	38	Case	16
Cys/Met metabolism PLP-dependent enzyme	15	Case	8
Cysteine protease Prp	17	Case	13
Cysteine-rich domain	32	Case	26
Cysteine-rich secretory protein family	3	Case	3
Cysteine-rich small domain	4	Case	4
Cytidine and deoxycytidylate deaminase zinc-binding region	15	Case	15
Cytidine and deoxycytidylate deaminase zinc-binding region	4	Case	4
Cytidylate kinase	8	Case	6
Cytidylate kinase-like family	17	Case	13
Cytidylyltransferase	10	Case	6
Cytidylyltransferase family	36	Case	17
Cytidylyltransferase-like	73	Case	18
Cytochrome bd terminal oxidase subunit I	4	Case	4
Cytochrome C biogenesis protein transmembrane region	23	Case	14
Cytochrome C biogenesis protein transmembrane region	19	Case	18
Cytosol aminopeptidase family, catalytic domain	24	Case	17
Cytosol aminopeptidase family, N-terminal domain	4	Case	4
D-ala D-ala ligase C-terminus	31	Case	28
D-Ala-D-Ala carboxypeptidase 3 (S13) family	6	Case	5
D-alanyl-D-alanine carboxypeptidase	22	Case	18
D-galactarate dehydratase / Altronate hydrolase, C terminus	9	Case	5
D-isomer specific 2-hydroxyacid dehydrogenase, catalytic domain	6	Case	5
D-isomer specific 2-hydroxyacid dehydrogenase, NAD binding domain	63	Case	21
D-Lysine 5,6-aminomutase TIM-barrel domain of alpha subunit	35	Case	25
D-Tyr-tRNA(Tyr) deacylase	17	Case	13
D12 class N6 adenine-specific DNA methyltransferase	28	Case	14
DAHP synthetase I family	32	Case	19
Dak1 domain	24	Case	16
DAK2 domain	46	Case	19
DALR anticodon binding domain	1	Case	1
DbpA RNA binding domain	8	Case	6
DDE domain	8	Case	7
Deacetylase PdaC	4	Case	4
DEAD_2	4	Case	4
DEAD/DEAH box helicase	46	Case	20
DegT/DnrJ/EryC1/StrS aminotransferase family	41	Case	18
Dehydratase family	13	Case	11
Dehydratase large subunit	26	Case	16
Dehydratase medium subunit	34	Case	14
Dehydratase small subunit	17	Case	13
Dehydrogenase E1 component	21	Case	19
Dehydroquinase class II	20	Case	16
Delta-aminolevulinic acid dehydratase	21	Case	16
DeoC/LacD family aldolase	8	Case	4
DeoR C terminal sensor domain	8	Case	4
Deoxynucleoside kinase	16	Case	15
Dephospho-CoA kinase	20	Case	17
Desulfoferrodoxin	4	Case	4
DHH family	23	Case	15
DHHA1 domain	97	Case	33
DHHA2 domain	5	Case	5
Diacylglycerol kinase catalytic domain	6	Case	6
Diaminopimelate epimerase	5	Case	5
Dicarboxylate carrier protein MatC N-terminus	4	Case	4
Diguanylate cyclase, GGDEF domain	7	Case	7
Dihydro-orotase-like	4	Case	4
Dihydrodipicolinate reductase, N-terminus	5	Case	5
Dihydrodipicolinate synthetase family	28	Case	7
Dihydrofolate reductase	19	Case	16
Dihydroneopterin aldolase	1	Case	1
Dihydroorotate dehydrogenase	12	Case	8
Dihydrouridine synthase (Dus)	37	Case	15
Dihydroxyacetone kinase family	5	Case	4
Dimerisation domain of d-ornithine 4,5-aminomutase	26	Case	20
Dimerisation domain of Zinc Transporter	16	Case	12
Dinitrogenase iron-molybdenum cofactor	4	Case	4
Diol dehydratase reactivase ATPase-like domain	20	Case	16
DisA bacterial checkpoint controller nucleotide-binding	28	Case	19
Divergent PAP2 family	4	Case	4
DJ-1/PfpI family	35	Case	15
DKNYY family	113	Case	25
DNA / pantothenate metabolism flavoprotein	22	Case	18
DNA alkylation repair enzyme	15	Case	11
DNA gyrase B	23	Case	19
DNA gyrase B subunit, carboxyl terminus	22	Case	14
DNA gyrase C-terminal domain, beta-propeller	6	Case	5
DNA gyrase/topoisomerase IV, subunit A	37	Case	25
DNA methylase	11	Case	11
DNA mismatch repair protein, C-terminal domain	4	Case	4
DNA polymerase family A	21	Case	15
DNA polymerase III beta subunit, C-terminal domain	39	Case	17
DNA polymerase III beta subunit, N-terminal domain	1	Case	1
DNA polymerase III, delta subunit	24	Case	17
DNA primase DnaG DnaB-binding	1	Case	1
DNA recombination-mediator protein A	42	Case	17
DNA topoisomerase	10	Case	9
DnaB-like helicase N terminal domain	27	Case	25
DnaJ C terminal domain	5	Case	5
DnaJ central domain	14	Case	14
DnaJ domain	42	Case	21
Dolichyl-phosphate-mannose-protein mannosyltransferase	29	Case	19
Dolichyl-phosphate-mannose-protein mannosyltransferase	1	Case	1
Domain of unknown function	7	Case	6
Domain of unknown function (4846)	17	Case	13
Domain of unknown function (DUF1732)	7	Case	6
Domain of unknown function (DUF1768)	11	Case	11
Domain of unknown function (DUF1788)	1	Case	1
Domain of unknown function (DUF1846)	29	Case	18
Domain of unknown function (DUF1858)	12	Case	12
Domain of unknown function (DUF1904)	17	Case	12
Domain of unknown function (DUF1949)	1	Case	1
Domain of unknown function (DUF1963)	22	Case	15
Domain of unknown function (DUF1967)	27	Case	17
Domain of unknown function (DUF202)	2	Case	2
Domain of unknown function (DUF3362)	36	Case	19
Domain of unknown function (DUF3440)	5	Case	5
Domain of Unknown Function (DUF350)	1	Case	1
Domain of unknown function (DUF3601)	31	Case	13
Domain of unknown function (DUF368)	17	Case	14
Domain of unknown function (DUF370)	7	Case	4
Domain of unknown function (DUF374)	18	Case	14
Domain of unknown function (DUF3870)	14	Case	9
Domain of unknown function (DUF389)	5	Case	5
Domain of unknown function (DUF4037)	13	Case	13
Domain of unknown function (DUF4093)	3	Case	3
Domain of unknown function (DUF4130	12	Case	12
Domain of unknown function (DUF4132)	36	Case	22
Domain of unknown function (DUF4133)	2	Case	2
Domain of unknown function (DUF4143)	44	Case	37
Domain of unknown function (DUF4184)	5	Case	3
Domain of unknown function (DUF4198)	48	Case	23
Domain of unknown function (DUF4234)	5	Case	4
Domain of unknown function (DUF4250)	3	Case	3
Domain of unknown function (DUF4253)	36	Case	15
Domain of unknown function (DUF4261)	19	Case	15
Domain of unknown function (DUF4291)	9	Case	4
Domain of unknown function (DUF4298)	7	Case	7
Domain of unknown function (DUF4299)	33	Case	17
Domain of unknown function (DUF4310)	9	Case	4
Domain of unknown function (DUF4355)	1	Case	1
Domain of unknown function (DUF4357)	4	Case	4
Domain of unknown function (DUF4375)	21	Case	14
Domain of unknown function (DUF4401)	8	Case	4
Domain of unknown function (DUF4418)	14	Case	13
Domain of unknown function (DUF4438)	6	Case	5
Domain of unknown function (DUF4911)	16	Case	13
Domain of unknown function (DUF4931)	2	Case	2
Domain of unknown function (DUF4942)	1	Case	1
Domain of unknown function (DUF5058)	4	Case	4
Domain of unknown function DUF83	13	Case	13
Double zinc ribbon	4	Case	4
DpnII restriction endonuclease	12	Case	12
DsrE/DsrF/DrsH-like family	13	Case	12
dTDP-4-dehydrorhamnose 3,5-epimerase	5	Case	5
DUF218 domain	12	Case	4
dUTPase	25	Case	15
DXP reductoisomerase C-terminal domain	3	Case	3
Dynamin family	22	Case	17
E1-E2 ATPase	17	Case	10
EAL domain	14	Case	6
EamA-like transporter family	190	Case	27
ECF transporter, substrate-specific component	1	Case	1
Eco57I restriction-modification methylase	5	Case	5
EcoEI R protein C-terminal	19	Case	12
Electron transfer flavoprotein domain	105	Case	27
Electron transfer flavoprotein FAD-binding domain	28	Case	22
Elongation factor G C-terminus	14	Case	7
Elongation Factor G, domain II	10	Case	5
Elongation factor G, domain IV	18	Case	17
Elongation factor P (EF-P) KOW-like domain	9	Case	5
Elongation factor P (EF-P) OB domain	18	Case	16
Elongation factor SelB, winged helix	4	Case	4
Elongation factor TS	36	Case	19
Elongation factor Tu C-terminal domain	13	Case	6
Elongation factor Tu domain 2	60	Case	28
Elongation factor Tu GTP binding domain	64	Case	22
Elongation-Factor P (EF-P) rhamnosyltransferase EarP	22	Case	18
Encapsulating protein for peroxidase	4	Case	4
Endonuclease/Exonuclease/phosphatase family	25	Case	14
Endoribonuclease L-PSP	33	Case	15
Enolase C-terminal domain-like	22	Case	15
Enolase, C-terminal TIM barrel domain	12	Case	6
Enolase, N-terminal domain	8	Case	7
Enoyl-(Acyl carrier protein) reductase	21	Case	7
Enoyl-CoA hydratase/isomerase	33	Case	25
Enterobacterial TraT complement resistance protein	18	Case	14
Epoxyqueuosine reductase QueH	33	Case	16
EpsG family	4	Case	4
EPSP synthase (3-phosphoshikimate 1-carboxyvinyltransferase)	85	Case	29
Ethanolamine ammonia lyase large subunit (EutB)	40	Case	22
Ethanolamine ammonia-lyase light chain (EutC)	8	Case	4
Ethanolamine utilisation - propanediol utilisation	25	Case	15
Ethanolamine utilisation protein EutA	26	Case	19
Ethanolamine utilisation protein EutN/carboxysome	33	Case	14
Ethanolamine utilisation protein EutQ	9	Case	5
Ethanolamine utilisation protein, EutH	35	Case	20
Etoposide-induced protein 2.4 (EI24)	4	Case	4
Eukaryotic-type carbonic anhydrase	4	Case	4
Exonuclease	34	Case	25
Exonuclease VII small subunit	13	Case	10
Exonuclease VII, large subunit	6	Case	6
Exopolysaccharide biosynthesis protein YbjH	36	Case	36
Extended Signal Peptide of Type V secretion system	8	Case	5
F420-0:Gamma-glutamyl ligase	8	Case	6
FabA-like domain	13	Case	11
FAD binding domain	40	Case	20
FAD binding domain	24	Case	18
FAD dependent oxidoreductase	113	Case	26
FAD linked oxidases, C-terminal domain	1	Case	1
FAD synthetase	1	Case	1
FAD-NAD(P)-binding	6	Case	4
FAE1/Type III polyketide synthase-like protein	15	Case	14
Family 4 glycosyl hydrolase	5	Case	4
Family 4 glycosyl hydrolase C-terminal domain	10	Case	5
Family of unknown function (DUF695)	16	Case	16
Fatty acid synthesis protein	22	Case	17
FCD domain	12	Case	4
Fe2+ transport protein	21	Case	16
FecCD transport family	89	Case	23
FeoA domain	20	Case	13
FeoB-associated Cys-rich membrane protein	3	Case	3
Ferredoxin-fold anticodon binding domain	5	Case	5
Ferric uptake regulator family	30	Case	17
Ferritin-like domain	26	Case	13
Ferrous iron transport protein B	45	Case	27
Ferrous iron transport protein B C terminus	4	Case	4
Fez1	1	Case	1
FGGY family of carbohydrate kinases, C-terminal domain	1	Case	1
FGGY family of carbohydrate kinases, N-terminal domain	47	Case	22
FHA domain	9	Case	5
FHIPEP family	2	Case	2
Fibronectin-binding protein A N-terminus (FbpA)	7	Case	7
Fic/DOC family	64	Case	22
Fic/DOC family N-terminal	10	Case	10
Firmicute fructose-1,6-bisphosphatase	30	Case	21
FKBP-type peptidyl-prolyl cis-trans isomerase	3	Case	3
Flagellar basal body rod FlgEFG protein C-terminal	2	Case	2
Flavin reductase like domain	58	Case	16
Flavodoxin	48	Case	16
Flavodoxin domain	72	Case	21
Flavodoxin-like fold	8	Case	4
Flavoprotein	2	Case	2
FlgD Ig-like domain	4	Case	4
FMN-binding domain	77	Case	19
FMN-dependent dehydrogenase	18	Case	9
Formate--tetrahydrofolate ligase	36	Case	20
Formate/nitrite transporter	20	Case	18
Formiminotransferase domain	20	Case	15
Formiminotransferase-cyclodeaminase	25	Case	16
Formyl transferase	35	Case	17
Formyl transferase, C-terminal domain	2	Case	2
Fructose-bisphosphate aldolase class-I	22	Case	16
Fructose-bisphosphate aldolase class-II	21	Case	7
FtsJ-like methyltransferase	28	Case	19
FtsK/SpoIIIE family	4	Case	4
FtsX-like permease family	65	Case	23
FtsZ family, C-terminal domain	7	Case	7
Fumarase C C-terminus	7	Case	7
Fumarase C-terminus	6	Case	5
Fumarate hydratase (Fumerase)	7	Case	6
Fumarate reductase flavoprotein C-term	4	Case	4
Fumarylacetoacetate (FAA) hydrolase family	4	Case	4
Fusaric acid resistance protein-like	4	Case	4
GAD domain	5	Case	5
GAF domain	23	Case	19
Galactokinase galactose-binding signature	30	Case	16
Galactose oxidase, central domain	14	Case	7
Galactose-1-phosphate uridyl transferase, C-terminal domain	5	Case	5
Galactose-1-phosphate uridyl transferase, N-terminal domain	39	Case	18
Gamma-glutamyltranspeptidase	25	Case	6
GatB domain	5	Case	5
GatB/GatE catalytic domain	24	Case	18
GCN5-related N-acetyl-transferase	10	Case	10
GcpE protein	50	Case	29
GDP-mannose 4,6 dehydratase	54	Case	20
GDSL-like Lipase/Acylhydrolase family	2	Case	2
GDYXXLXY protein	2	Case	2
GH3 auxin-responsive promoter	3	Case	3
GHKL domain	2	Case	2
GHMP kinases C terminal	22	Case	14
GHMP kinases N terminal domain	4	Case	4
GidA associated domain	1	Case	1
GIY-YIG catalytic domain	30	Case	18
Glu-tRNAGln amidotransferase C subunit	16	Case	13
Glu/Leu/Phe/Val dehydrogenase, dimerisation domain	1	Case	1
Glucokinase	1	Case	1
Glucosamine-6-phosphate isomerases/6-phosphogluconolactonase	19	Case	15
Glucose / Sorbosone dehydrogenase	5	Case	5
Glucose inhibited division protein A	38	Case	24
Glutamate/Leucine/Phenylalanine/Valine dehydrogenase	28	Case	15
Glutaminase	25	Case	16
Glutamine amidotransferase class-I	83	Case	20
Glutamine amidotransferase domain	24	Case	18
Glutamine synthetase type III N terminal	7	Case	7
Glutamine synthetase, beta-Grasp domain	1	Case	1
Glutamine synthetase, catalytic domain	34	Case	21
Glutamyl-tRNAGlu reductase, N-terminal domain	14	Case	14
Glutaredoxin	5	Case	5
Glutathione peroxidase	9	Case	9
Glyceraldehyde 3-phosphate dehydrogenase, C-terminal domain	5	Case	4
Glyceraldehyde 3-phosphate dehydrogenase, NAD binding domain	25	Case	17
Glycerate kinase family	4	Case	4
Glycerol-3-phosphate acyltransferase	23	Case	13
Glycerol-3-phosphate responsive antiterminator	18	Case	13
Glycerophosphoryl diester phosphodiesterase family	63	Case	21
Glycine radical	44	Case	22
Glycine zipper	9	Case	5
Glycine-rich SFCGS	4	Case	4
Glycoprotease family	39	Case	21
Glycoside-hydrolase family GH114	9	Case	9
Glycosyl hydrolase family 3 N terminal domain	5	Case	5
Glycosyl hydrolase family 57	3	Case	3
Glycosyl hydrolase-like 10	1	Case	1
Glycosyl transferase 4-like	20	Case	16
Glycosyl transferase family 2	43	Case	18
Glycosyl transferase family 21	7	Case	7
Glycosyl transferase family 4	33	Case	21
Glycosyl transferase family, helical bundle domain	2	Case	2
Glycosyl transferases group 1	23	Case	8
Glycosyltransferase family 25 (LPS biosynthesis protein)	6	Case	6
Glycosyltransferase family 28 C-terminal domain	10	Case	6
Glycosyltransferase family 28 N-terminal domain	19	Case	18
Glycosyltransferase Family 4	24	Case	15
Glycosyltransferase family 52	1	Case	1
Glycosyltransferase family 9 (heptosyltransferase)	113	Case	25
Glycosyltransferase GT-D fold	1	Case	1
Glycosyltransferase like family 2	41	Case	19
Glycyl-tRNA synthetase alpha subunit	29	Case	19
Glycyl-tRNA synthetase beta subunit	29	Case	20
Glyoxalase-like domain	4	Case	4
Glyoxalase/Bleomycin resistance protein/Dioxygenase superfamily	27	Case	13
GntP family permease	34	Case	22
Gram-negative bacterial TonB protein C-terminal	45	Case	21
GrpE	24	Case	15
GTP cyclohydrolase I	20	Case	13
GTP cyclohydrolase II	35	Case	21
GTP-binding GTPase N-terminal	21	Case	17
Guanylate kinase	1	Case	1
GyrI-like small molecule binding domain	1	Case	1
HAD-hyrolase-like	16	Case	15
Haem utilisation ChuX/HutX	5	Case	5
Haem-degrading	11	Case	11
haemagglutination activity domain	82	Case	28
Haemolysin secretion/activation protein ShlB/FhaC/HecB	23	Case	20
Haemolysin XhlA	1	Case	1
Haemolysin-III related	19	Case	14
haloacid dehalogenase-like hydrolase	174	Case	30
Haloacid dehalogenase-like hydrolase	61	Case	18
Ham1 family	20	Case	13
HD domain	87	Case	30
HDOD domain	12	Case	8
Head domain of trimeric autotransporter adhesin	14	Case	9
Heat induced stress protein YflT	18	Case	17
HEAT repeat	1	Case	1
HEAT repeats	22	Case	15
Heavy-metal-associated domain	32	Case	18
Helicase conserved C-terminal domain	122	Case	29
Helix-hairpin-helix domain	26	Case	22
Helix-hairpin-helix motif	43	Case	21
Helix-turn-helix	13	Case	8
Helix-turn-helix domain	136	Case	33
Helix-turn-helix domain, rpiR family	9	Case	5
Hemagglutinin repeat	105	Case	24
HemN C-terminal domain	1	Case	1
Heptaprenyl diphosphate synthase component I	16	Case	12
Hexapeptide repeat of succinyl-transferase	40	Case	26
HhH-GPD superfamily base excision DNA repair protein	26	Case	17
HI0933-like protein	13	Case	5
HicB_like antitoxin of bacterial toxin-antitoxin system	5	Case	5
HIGH Nucleotidyl Transferase	19	Case	14
High-affinity nickel-transport protein	20	Case	15
HipA-like C-terminal domain	1	Case	1
His Kinase A (phospho-acceptor) domain	46	Case	16
Histidine biosynthesis protein	19	Case	18
Histidine carboxylase PI chain	4	Case	4
Histidine kinase	28	Case	20
Histidine kinase-, DNA gyrase B-, and HSP90-like ATPase	195	Case	31
Histidine phosphatase superfamily (branch 1)	60	Case	22
Histidyl-tRNA synthetase	7	Case	7
Histone deacetylase domain	3	Case	3
HlyD family secretion protein	56	Case	22
HMGL-like	12	Case	6
Holliday junction DNA helicase RuvB P-loop domain	17	Case	17
Holliday junction resolvase	17	Case	13
Holliday-junction resolvase-like of SPT6	6	Case	5
Hom_end-associated Hint	5	Case	5
Homeodomain-like domain	5	Case	4
Homocysteine S-methyltransferase	10	Case	5
Homoserine dehydrogenase	20	Case	18
Homoserine dehydrogenase, NAD binding domain	19	Case	11
Homoserine O-succinyltransferase	5	Case	5
HpcH/HpaI aldolase/citrate lyase family	46	Case	21
HPr Serine kinase C-terminal domain	27	Case	20
HPr Serine kinase N terminus	2	Case	2
HrcA protein C terminal domain	39	Case	19
HRDC domain	17	Case	17
HsdM N-terminal domain	7	Case	6
Hsp33 protein	30	Case	15
Hsp70 protein	51	Case	25
Hsp90 protein	3	Case	3
HTH domain	72	Case	18
HutD	24	Case	17
HutP	4	Case	4
HxlR-like helix-turn-helix	30	Case	14
Hydantoinase/oxoprolinase N-terminal region	1	Case	1
Hydin Adenylate kinase-like domain	21	Case	17
Hydrogenase formation hypA family	3	Case	3
Hydroxyethylthiazole kinase family	14	Case	13
HypF finger	2	Case	2
Hypothetical bacterial integral membrane protein (Trep_Strep)	1	Case	1
Immunity protein 26	14	Case	14
IMP dehydrogenase / GMP reductase domain	24	Case	17
impB/mucB/samB family	17	Case	13
impB/mucB/samB family C-terminal domain	1	Case	1
Inhibitor of apoptosis-promoting Bax1	13	Case	9
Initiation factor 2 subunit family	12	Case	10
Initiator Replication protein	11	Case	7
Inner membrane component domain	4	Case	4
Inner membrane protein CreD	35	Case	16
Inorganic H+ pyrophosphatase	42	Case	24
Insulinase (Peptidase family M16)	5	Case	5
Integral membrane protein (intg_mem_TP0381)	18	Case	14
Integrase core domain	20	Case	9
Intermediate filament protein	1	Case	1
Ion channel	4	Case	4
IPP transferase	17	Case	12
Iron hydrogenase small subunit	3	Case	3
Iron only hydrogenase large subunit, C-terminal domain	4	Case	4
Iron permease FTR1 family	28	Case	21
Iron-containing alcohol dehydrogenase	36	Case	12
Iron-containing alcohol dehydrogenase	82	Case	26
Iron-sulfur cluster binding domain of dihydroorotate dehydrogenase B	4	Case	4
IrrE N-terminal-like domain	14	Case	14
Isochorismatase family	9	Case	4
Isocitrate/isopropylmalate dehydrogenase	10	Case	10
Isopentenyl transferase	1	Case	1
IstB-like ATP binding protein	12	Case	8
K+-transporting ATPase, c chain	4	Case	4
KaiC	46	Case	27
KDGP aldolase	5	Case	4
KDPG and KHG aldolase	12	Case	4
Ketopantoate reductase PanE/ApbA	5	Case	5
KH domain	55	Case	24
KOW motif	25	Case	18
KR domain	49	Case	21
L-fucose isomerase, C-terminal domain	5	Case	4
L-seryl-tRNA selenium transferase	9	Case	5
L,D-transpeptidase catalytic domain	39	Case	18
lactate/malate dehydrogenase, NAD binding domain	23	Case	19
LamB/YcsF family	27	Case	17
Large ribosomal RNA subunit accumulation protein YceD	5	Case	4
Large-conductance mechanosensitive channel, MscL	18	Case	15
Late embryogenesis abundant protein	4	Case	4
LD-carboxypeptidase N-terminal domain	9	Case	5
LemA family	19	Case	15
Leucine carboxyl methyltransferase	26	Case	14
Leucine Rich repeats (2 copies)	4	Case	4
Leucyl-tRNA synthetase, Domain 2	1	Case	1
LicD family	18	Case	14
Ligated ion channel L-glutamate- and glycine-binding site	38	Case	18
Linear amide C-N hydrolases, choloylglycine hydrolase family	4	Case	4
Lipid A Biosynthesis N-terminal domain	3	Case	3
Lipid II flippase MurJ	9	Case	5
Lipid-A-disaccharide synthetase	20	Case	16
Lipopolysaccharide core biosynthesis protein (WaaY)	4	Case	4
Lipopolysaccharide export system permease LptF/LptG	41	Case	19
Lipopolysaccharide-assembly, LptC-related	17	Case	17
Lon protease (S16) C-terminal proteolytic domain	25	Case	20
LpxI C-terminal domain	20	Case	14
LrgA family	30	Case	15
LrgB-like family	44	Case	19
LUD domain	22	Case	17
Lumazine binding domain	28	Case	21
Lyase	16	Case	10
LysE type translocator	24	Case	16
Lysine exporter LysO	17	Case	12
Lysine methyltransferase	23	Case	14
Lysine-2,3-aminomutase	5	Case	5
LysM domain	9	Case	5
Lysozyme inhibitor LprI	10	Case	10
LysR substrate binding domain	38	Case	19
Lysylphosphatidylglycerol synthase TM region	2	Case	2
LytB protein	5	Case	5
Lytic transglycolase	5	Case	5
LytR cell envelope-related transcriptional attenuator	19	Case	15
LytTr DNA-binding domain	19	Case	15
M42 glutamyl aminopeptidase	22	Case	18
MacB-like periplasmic core domain	51	Case	20
Macro domain	12	Case	12
Maf-like protein	18	Case	15
MafB19-like deaminase	8	Case	4
Magnesium chelatase, subunit ChlI	9	Case	5
Major Facilitator Superfamily	68	Case	26
Major intrinsic protein	28	Case	18
Male sterility protein	17	Case	16
Malic enzyme, N-terminal domain	16	Case	16
Malic enzyme, NAD binding domain	8	Case	7
Malonate decarboxylase delta subunit (MdcD)	21	Case	13
Malonate decarboxylase, alpha subunit, transporter	2	Case	2
Maltogenic Amylase, C-terminal domain	1	Case	1
Mandelate racemase / muconate lactonizing enzyme, N-terminal domain	16	Case	12
Mannosyl-glycoprotein endo-beta-N-acetylglucosaminidase	25	Case	16
MaoC like domain	4	Case	4
MarC family integral membrane protein	8	Case	4
MarR family	66	Case	24
MatE	141	Case	29
Matrixin	1	Case	1
MazG-like family	3	Case	3
MBOAT, membrane-bound O-acyltransferase family	1	Case	1
Mechanosensitive ion channel	22	Case	14
Membrane bound O-acyl transferase family	6	Case	5
Membrane dipeptidase (Peptidase family M19)	5	Case	5
Membrane transport protein	31	Case	15
Memo-like protein	1	Case	1
MerR family regulatory protein	25	Case	14
MerR HTH family regulatory protein	6	Case	4
MerR, DNA binding	3	Case	3
Met-10+ like-protein	5	Case	5
META domain	25	Case	16
Metal-sensitive transcriptional repressor	9	Case	5
Metallo-beta-lactamase superfamily	132	Case	30
Metalloenzyme superfamily	10	Case	6
Metallopeptidase family M24	25	Case	14
Methionine gamma-lyase	21	Case	17
Methyl-viologen-reducing hydrogenase, delta subunit	4	Case	4
Methyladenine glycosylase	4	Case	4
Methylaspartate ammonia-lyase C-terminus	27	Case	20
Methylaspartate mutase E chain (MutE)	28	Case	17
Methylenetetrahydrofolate reductase	17	Case	13
Methylmalonyl-CoA mutase	2	Case	2
Methylpurine-DNA glycosylase (MPG)	4	Case	4
Methyltransferase domain	197	Case	30
Methyltransferase small domain	21	Case	13
Methyltransferase TRM13	10	Case	10
MFS_1 like family	5	Case	4
MFS/sugar transport protein	22	Case	10
MG2 domain	36	Case	25
Mga helix-turn-helix domain	28	Case	15
MGS-like domain	21	Case	17
MgsA AAA+ ATPase C terminal	6	Case	5
MgtC family	27	Case	16
MgtE intracellular N domain	4	Case	4
Middle domain of thiamine pyrophosphate	1	Case	1
MlaA lipoprotein	17	Case	16
MlaD protein	3	Case	3
MltA-interacting protein MipA	8	Case	4
MMPL family	59	Case	26
MnmE helical domain	17	Case	10
MoaC family	4	Case	4
MobA-like NTP transferase domain	77	Case	29
MobA/MobL family	3	Case	3
Molybdenum Cofactor Synthesis C	4	Case	4
Molybdopterin-binding domain of aldehyde dehydrogenase	6	Case	6
Molydopterin dinucleotide binding domain	4	Case	4
MORN repeat	4	Case	4
MORN repeat variant	444	Case	30
MotA/TolQ/ExbB proton channel family	48	Case	16
MraW methylase family	35	Case	18
MreB/Mbl protein	32	Case	18
mRNA cleavage and polyadenylation factor CLP1 P-loop	5	Case	5
Multi-copper polyphenol oxidoreductase laccase	19	Case	13
Mur ligase family, catalytic domain	4	Case	3
Mur ligase family, glutamate ligase domain	50	Case	23
Mur ligase middle domain	90	Case	29
MutL C terminal dimerisation domain	7	Case	6
MutL protein	27	Case	15
MutS domain II	6	Case	6
MutS domain III	19	Case	18
MutS domain V	35	Case	24
MutS family domain IV	2	Case	2
Mycolic acid cyclopropane synthetase	4	Case	4
Mycoplasma protein of unknown function, DUF285	17	Case	13
N-6 DNA Methylase	48	Case	16
N-acetylmuramoyl-L-alanine amidase	49	Case	23
N-terminal half of MaoC dehydratase	4	Case	4
N-terminal TM domain of oligopeptide transport permease C	19	Case	15
Na+-H+ antiporter family	4	Case	4
Na+-transporting oxaloacetate decarboxylase beta subunit	38	Case	24
Na+/H+ antiporter 1	3	Case	2
Na+/H+ antiporter family	268	Case	35
Na+/Pi-cotransporter	35	Case	20
NAD binding domain of 6-phosphogluconate dehydrogenase	15	Case	6
NAD dependent epimerase/dehydratase family	38	Case	19
NAD synthase	23	Case	6
NAD-dependent DNA ligase C4 zinc finger domain	15	Case	15
NAD-dependent DNA ligase OB-fold domain	7	Case	7
NAD-dependent glycerol-3-phosphate dehydrogenase C-terminus	2	Case	2
NAD-dependent glycerol-3-phosphate dehydrogenase N-terminus	22	Case	17
NAD(P)-binding Rossmann-like domain	21	Case	8
NAD(P)H-binding	4	Case	4
NADH ubiquinone oxidoreductase, 20 Kd subunit	2	Case	2
NADH-ubiquinone oxidoreductase-F iron-sulfur binding region	1	Case	1
NADH:flavin oxidoreductase / NADH oxidase family	25	Case	15
NADP oxidoreductase coenzyme F420-dependent	4	Case	4
NADPH-dependent FMN reductase	7	Case	7
Natural resistance-associated macrophage protein	23	Case	16
NeuB family	24	Case	15
NFACT protein RNA binding domain	19	Case	18
NfeD-like C-terminal, partner-binding	13	Case	13
Nickel-dependent hydrogenase	3	Case	3
Nicotinamide mononucleotide transporter	1	Case	1
Nicotinate phosphoribosyltransferase (NAPRTase) family	2	Case	2
NIF3 (NGG1p interacting factor 3)	19	Case	13
NifU-like domain	4	Case	4
NifU-like N terminal domain	26	Case	17
Nitrite and sulphite reductase 4Fe-4S domain	4	Case	4
Nitrite/Sulfite reductase ferredoxin-like half domain	4	Case	4
Nitronate monooxygenase	41	Case	27
Nitroreductase family	32	Case	16
NLPA lipoprotein	33	Case	17
NlpC/P60 family	4	Case	4
NMT1-like family	4	Case	4
NMT1/THI5 like	24	Case	14
NQR2, RnfD, RnfE family	32	Case	18
NUBPL iron-transfer P-loop NTPase	14	Case	14
Nucleoside diphosphate kinase	1	Case	1
Nucleoside recognition	34	Case	20
Nucleotide-binding C-terminal domain	14	Case	14
Nucleotidyl transferase	50	Case	24
Nucleotidyl transferase AbiEii toxin, Type IV TA system	15	Case	12
NUDIX domain	82	Case	18
NusA N-terminal domain	5	Case	5
NusA-like KH domain	25	Case	19
NusB family	18	Case	16
NusG domain II	19	Case	14
O-Antigen ligase	22	Case	16
OB-fold nucleic acid binding domain	87	Case	25
Oligopeptidase F	21	Case	17
Oligopeptide/dipeptide transporter, C-terminal region	22	Case	17
OmpA family	79	Case	20
Omptin family	4	Case	4
OPT oligopeptide transporter protein	12	Case	10
Orn/Lys/Arg decarboxylase, C-terminal domain	4	Case	4
Orn/Lys/Arg decarboxylase, major domain	5	Case	5
Orotidine 5'-phosphate decarboxylase / HUMPS family	21	Case	15
Osmosensitive K+ channel His kinase sensor domain	4	Case	4
OstA-like protein	8	Case	7
Outer membrane efflux protein	102	Case	27
Outer membrane protein (OmpH-like)	26	Case	19
Outer membrane protein beta-barrel domain	6	Case	5
Outer membrane protein beta-barrel family	1	Case	1
Outer membrane protein transport protein (OMPP1/FadL/TodX)	15	Case	15
Oxaloacetate decarboxylase, gamma chain	16	Case	14
Oxidoreductase family, C-terminal alpha/beta domain	5	Case	5
Oxidoreductase family, NAD-binding Rossmann fold	10	Case	10
Oxidoreductase NAD-binding domain	52	Case	19
Oxygen tolerance	4	Case	4
P-loop ATPase protein family	25	Case	19
P-loop containing region of AAA domain	92	Case	33
Pantoate-beta-alanine ligase	2	Case	2
PAP2 superfamily	18	Case	12
ParB-like nuclease domain	6	Case	6
ParE toxin of type II toxin-antitoxin system, parDE	7	Case	6
PAS domain	22	Case	15
PAS fold	5	Case	5
Passenger-associated-transport-repeat	5	Case	4
PASTA domain	40	Case	24
Patatin-like phospholipase	24	Case	16
PBP superfamily domain	6	Case	5
PCRF domain	39	Case	17
PD-(D/E)XK nuclease superfamily	139	Case	31
PDGLE domain	4	Case	4
PDZ domain	25	Case	19
Penicillin binding protein transpeptidase domain	60	Case	22
Penicillin-Binding Protein C-terminus Family	6	Case	4
Penicillin-binding Protein dimerisation domain	1	Case	1
Pentapeptide repeats (8 copies)	5	Case	5
PEP-utilising enzyme, mobile domain	19	Case	19
PEP-utilising enzyme, N-terminal	18	Case	15
PEP-utilising enzyme, TIM barrel domain	42	Case	26
Peptidase C26	39	Case	19
Peptidase dimerisation domain	177	Case	30
Peptidase family M20/M25/M40	128	Case	20
Peptidase family M23	60	Case	27
Peptidase family M28	5	Case	4
Peptidase family M3	10	Case	5
Peptidase family M41	61	Case	25
Peptidase family M48	39	Case	21
Peptidase family M50	25	Case	16
Peptidase family S41	2	Case	1
Peptidase family S49	7	Case	6
Peptidase family S51	17	Case	13
Peptidase family S58	4	Case	4
Peptidase family U32	33	Case	17
Peptidase family U32 C-terminal domain	4	Case	4
Peptidase M15	4	Case	4
Peptidase M16 inactive domain	22	Case	16
Peptidase M16C associated	4	Case	4
Peptidase propeptide and YPEB domain	30	Case	15
Peptidase S24-like	27	Case	15
Peptide methionine sulfoxide reductase	20	Case	18
Peptidyl-tRNA hydrolase	21	Case	17
Periplasmic binding protein	85	Case	22
Periplasmic binding protein domain	49	Case	24
Periplasmic binding proteins and sugar binding domain of LacI family	39	Case	21
Permease family	113	Case	30
Permease for cytosine/purines, uracil, thiamine, allantoin	8	Case	4
Permease MlaE	6	Case	6
Permuted papain-like amidase enzyme, YaeF/YiiX, C92 family	12	Case	9
Peroxide stress protein YaaA	4	Case	4
Pertactin	1	Case	1
pfkB family carbohydrate kinase	71	Case	19
PglZ domain	16	Case	14
Phage capsid family	2	Case	2
Phage integrase family	57	Case	35
Phage integrase SAM-like domain	5	Case	5
Phage integrase, N-terminal SAM-like domain	54	Case	21
Phage Mu protein F like protein	4	Case	4
Phage virion morphogenesis family	4	Case	4
Phage-related minor tail protein	4	Case	4
Phenazine biosynthesis-like protein	23	Case	15
Phosphate acetyl/butaryl transferase	28	Case	21
Phosphate propanoyltransferase	24	Case	14
Phosphatidylglycerophosphatase A	20	Case	16
Phosphatidylserine decarboxylase	24	Case	19
Phosphoadenosine phosphosulfate reductase family	2	Case	2
Phosphodiester glycosidase	4	Case	4
Phosphoenolpyruvate carboxykinase	21	Case	20
Phosphoenolpyruvate carboxylase	5	Case	5
phosphoenolpyruvate-dependent sugar phosphotransferase system, EIIA 1	18	Case	14
Phosphoenolpyruvate-dependent sugar phosphotransferase system, EIIA 2	57	Case	19
Phosphofructokinase	30	Case	19
Phosphoglucomutase/phosphomannomutase, alpha/beta/alpha domain I	1	Case	1
Phosphoglucomutase/phosphomannomutase, alpha/beta/alpha domain II	5	Case	4
Phosphoglucomutase/phosphomannomutase, alpha/beta/alpha domain III	40	Case	27
Phosphoglucomutase/phosphomannomutase, C-terminal domain	15	Case	15
Phosphoglucose isomerase	24	Case	17
Phosphoglycerate kinase	27	Case	18
Phospholipase_D-nuclease N-terminal	5	Case	5
Phospholipid methyltransferase	1	Case	1
Phosphomannose isomerase type I	4	Case	4
Phosphomethylpyrimidine kinase	17	Case	9
Phosphopantetheine attachment site	7	Case	6
Phosphoribosyl synthetase-associated domain	34	Case	18
Phosphoribosyl transferase domain	130	Case	26
Phosphoribosyl-ATP pyrophosphohydrolase	4	Case	4
Phosphoribosylglycinamide synthetase, ATP-grasp (A) domain	4	Case	4
Phosphoribosylglycinamide synthetase, N domain	15	Case	14
Phosphoribosyltransferase	29	Case	20
Phosphoribulokinase / Uridine kinase family	4	Case	4
Phosphorylase superfamily	66	Case	26
Phosphotransferase enzyme family	33	Case	17
phosphotransferase system, EIIB	42	Case	13
Phosphotransferase system, EIIC	24	Case	16
Phosphotransferase system, EIIC	40	Case	21
PhoU domain	6	Case	6
PHP domain	34	Case	17
PilZ domain	1	Case	1
PIN domain	5	Case	5
Pirin	5	Case	5
PLD-like domain	21	Case	16
Poly A polymerase head domain	4	Case	4
Polymer-forming cytoskeletal	8	Case	4
Polypeptide deformylase	25	Case	16
Polyphosphate kinase C-terminal domain 2	4	Case	4
Polyprenyl synthetase	42	Case	19
Polyribonucleotide nucleotidyltransferase, RNA binding domain	13	Case	6
Polysaccharide biosynthesis C-terminal domain	162	Case	27
Polysaccharide biosynthesis protein	61	Case	20
Polysaccharide deacetylase	23	Case	18
Polysaccharide pyruvyl transferase	7	Case	7
Porphobilinogen deaminase, C-terminal domain	21	Case	14
Porphobilinogen deaminase, dipyromethane cofactor binding domain	12	Case	11
Positive regulator of sigma(E), RseC/MucC	18	Case	13
Possible lysine decarboxylase	14	Case	14
Potassium-transporting ATPase A subunit	4	Case	4
POTRA domain	37	Case	16
POTRA domain, FtsQ-type	49	Case	23
POTRA domain, ShlB-type	4	Case	4
PP-loop family	64	Case	21
PPIC-type PPIASE domain	30	Case	21
PPR repeat	1	Case	1
Ppx/GppA phosphatase family	13	Case	11
PRC-barrel domain	1	Case	1
PRD domain	4	Case	4
Precorrin-6x reductase CbiJ/CobK	19	Case	14
Precorrin-8X methylmutase	22	Case	17
Predicted AAA-ATPase	163	Case	24
Predicted ATPase of the ABC class	4	Case	4
Predicted membrane protein (DUF2085)	4	Case	4
Predicted membrane protein (DUF2157)	4	Case	4
Predicted membrane protein (DUF2207)	34	Case	15
Predicted membrane protein (DUF2318)	23	Case	17
Predicted membrane protein (DUF2335)	5	Case	5
Predicted membrane protein (DUF2339)	4	Case	4
Predicted metal-binding protein (DUF2284)	4	Case	4
Predicted permease	7	Case	6
Predicted Permease Membrane Region	24	Case	20
Predicted SPOUT methyltransferase	17	Case	13
Prephenate dehydratase	4	Case	4
Prephenate dehydrogenase	7	Case	6
Preprotein translocase SecG subunit	16	Case	12
Preprotein translocase subunit	14	Case	10
Prismane/CO dehydrogenase family	34	Case	19
Probable molybdopterin binding domain	29	Case	14
Probable RNA and SrmB- binding site of polymerase A	4	Case	4
Probable transposase	72	Case	19
Prokaryotic diacylglycerol kinase	5	Case	5
Prokaryotic N-terminal methylation motif	9	Case	9
Prolipoprotein diacylglyceryl transferase	32	Case	16
Prolyl oligopeptidase family	25	Case	18
Proteasome subunit	4	Case	4
Protein export membrane protein	33	Case	18
Protein kinase domain	4	Case	4
Protein of unknown function DUF134	4	Case	4
Protein of unknown function (DUF1007)	16	Case	14
Protein of unknown function (DUF1232)	4	Case	4
Protein of unknown function (DUF1275)	23	Case	15
Protein of unknown function (DUF1353)	22	Case	14
Protein of unknown function (DUF1385)	25	Case	18
Protein of unknown function (DUF1456)	16	Case	13
Protein of unknown function (DUF1524)	16	Case	16
Protein of unknown function (DUF1538)	4	Case	4
Protein of unknown function (DUF1576)	24	Case	14
Protein of unknown function (DUF1667)	20	Case	11
Protein of unknown function (DUF1694)	5	Case	5
Protein of unknown function (DUF1706)	4	Case	4
Protein of unknown function (DUF1847)	5	Case	5
Protein of unknown function (DUF2000)	3	Case	3
Protein of unknown function (DUF2023)	3	Case	3
Protein of unknown function (DUF2589)	9	Case	5
Protein of unknown function (DUF2628)	4	Case	4
Protein of unknown function (DUF2634)	1	Case	1
Protein of unknown function (DUF2752)	4	Case	4
Protein of unknown function (DUF2813)	4	Case	4
Protein of unknown function (DUF2920)	5	Case	5
Protein of unknown function (DUF3084)	3	Case	3
Protein of unknown function (DUF3100)	11	Case	11
Protein of unknown function (DUF3137)	1	Case	1
Protein of unknown function (DUF3290)	9	Case	8
Protein of unknown function (DUF3307)	14	Case	14
Protein of unknown function (DUF3343)	4	Case	4
Protein of unknown function (DUF3604)	4	Case	4
Protein of unknown function (DUF3795)	4	Case	4
Protein of unknown function (DUF3798)	51	Case	22
Protein of unknown function (DUF3829)	7	Case	5
Protein of unknown function (DUF3847)	3	Case	3
Protein of unknown function (DUF401)	4	Case	4
Protein of unknown function (DUF4026)	6	Case	4
Protein of unknown function (DUF4125)	14	Case	14
Protein of unknown function (DUF421)	9	Case	9
Protein of unknown function (DUF4241)	31	Case	16
Protein of unknown function (DUF436)	2	Case	2
Protein of unknown function (DUF445)	23	Case	18
Protein of unknown function (DUF448)	10	Case	6
Protein of unknown function (DUF452)	11	Case	7
Protein of unknown function (DUF454)	12	Case	12
Protein of unknown function (DUF496)	15	Case	13
Protein of unknown function (DUF502)	19	Case	15
Protein of unknown function (DUF5131)	4	Case	4
Protein of unknown function (DUF523)	28	Case	14
Protein of unknown function (DUF535)	5	Case	5
Protein of unknown function (DUF541)	8	Case	7
Protein of unknown function (DUF554)	18	Case	13
Protein of unknown function (DUF560)	2	Case	2
Protein of unknown function (DUF561)	4	Case	4
Protein of unknown function (DUF805)	3	Case	3
Protein of unknown function (DUF819)	33	Case	18
Protein of unknown function (DUF861)	16	Case	15
Protein of unknown function (DUF933)	9	Case	5
Protein of unknown function (DUF969)	5	Case	5
Protein of unknown function (DUF979)	5	Case	5
Protein of unknown function (DUF997)	11	Case	10
Protein of unknown function DUF111	4	Case	4
Protein of unknown function DUF116	17	Case	13
Protein of unknown function DUF45	18	Case	14
PSP1 C-terminal conserved region	24	Case	17
Pterin binding enzyme	34	Case	17
PTS HPr component phosphorylation site	36	Case	15
PTS system fructose IIA component	25	Case	14
PTS system mannose/fructose/sorbose family IID component	13	Case	7
PTS system sorbose subfamily IIB component	4	Case	4
PTS system sorbose-specific iic component	4	Case	4
PTS system sugar-specific permease component	14	Case	6
PTS system, Lactose/Cellobiose specific IIA subunit	4	Case	4
PTS system, Lactose/Cellobiose specific IIB subunit	53	Case	22
Putative ABC-transporter type IV	9	Case	5
Putative aromatic acid exporter C-terminal domain	4	Case	4
Putative ATP-dependent DNA helicase recG C-terminal	19	Case	19
Putative ATP-dependent Lon protease	17	Case	15
Putative cyclase	4	Case	4
Putative DNA-binding domain	15	Case	14
Putative esterase	13	Case	5
Putative exopolysaccharide Exporter (EPS-E)	13	Case	13
Putative Fe-S cluster	6	Case	6
Putative glycosyl hydrolase domain	24	Case	18
Putative helix-turn-helix protein, YlxM / p13 like	9	Case	9
Putative HNHc nuclease	1	Case	1
Putative inner membrane protein (DUF1819)	1	Case	1
Putative manganese efflux pump	22	Case	15
Putative member of DMT superfamily (DUF486)	3	Case	3
Putative membrane protein insertion efficiency factor	15	Case	13
Putative methyltransferase	25	Case	16
Putative methyltransferase	12	Case	7
Putative N-acetylmannosamine-6-phosphate epimerase	4	Case	4
Putative NAD(P)-binding	14	Case	10
Putative peptidoglycan binding domain	9	Case	9
Putative redox-active protein (C_GCAxxG_C_C)	1	Case	1
Putative RNA methylase family UPF0020	18	Case	14
Putative sugar diacid recognition	4	Case	4
Putative sugar-binding domain	4	Case	4
Putative threonine/serine exporter	34	Case	20
Putative TM nitroreductase	37	Case	18
Putative TPR-like repeat	6	Case	5
Putative transposase	11	Case	11
Putative transposase DNA-binding domain	6	Case	6
Putative tRNA binding domain	2	Case	2
Putative undecaprenyl diphosphate synthase	23	Case	17
Putative vitamin uptake transporter	26	Case	16
Pyridine nucleotide-disulphide oxidoreductase	132	Case	32
Pyridine nucleotide-disulphide oxidoreductase, dimerisation domain	57	Case	21
Pyridoxal phosphate biosynthetic protein PdxA	19	Case	15
Pyridoxal-dependent decarboxylase conserved domain	25	Case	13
Pyridoxal-dependent decarboxylase, C-terminal sheet domain	6	Case	6
Pyridoxal-phosphate dependent enzyme	103	Case	21
Pyridoxamine 5'-phosphate oxidase	31	Case	15
Pyridoxamine 5'-phosphate oxidase like	9	Case	8
Pyroglutamyl peptidase	35	Case	17
Pyrroline-5-carboxylate reductase dimerisation	4	Case	4
Pyruvate ferredoxin/flavodoxin oxidoreductase	14	Case	6
Pyruvate flavodoxin/ferredoxin oxidoreductase, thiamine diP-bdg	20	Case	11
Pyruvate formate lyase-like	23	Case	11
Pyruvate kinase, alpha/beta domain	6	Case	4
Pyruvate kinase, barrel domain	9	Case	5
Pyruvate phosphate dikinase, PEP/pyruvate binding domain	5	Case	5
Pyruvate:ferredoxin oxidoreductase core domain II	7	Case	6
Queuine tRNA-ribosyltransferase	26	Case	16
Queuosine biosynthesis protein	26	Case	19
Queuosine biosynthesis protein QueC	31	Case	16
Quinolinate phosphoribosyl transferase, C-terminal domain	21	Case	15
Quinolinate phosphoribosyl transferase, N-terminal domain	4	Case	4
Quinolinate synthetase A protein	30	Case	19
R3H domain	17	Case	16
Rad51	33	Case	22
RadC-like JAB domain	18	Case	15
Radical SAM N-terminal	4	Case	4
Radical SAM superfamily	321	Case	41
Radical SAM ThiC family	32	Case	21
Radical_SAM C-terminal domain	18	Case	16
Ras family	7	Case	5
Ras of Complex, Roc, domain of DAPkinase	25	Case	16
RbsD / FucU transport protein family	4	Case	4
Receptor family ligand binding region	1	Case	1
RecF/RecN/SMC N terminal domain	246	Case	33
RecG wedge domain	4	Case	3
Recombinase	1	Case	1
Recombination protein O C terminal	4	Case	4
Recombination protein O N terminal	12	Case	12
RecR protein	5	Case	5
RecX family	23	Case	15
Redoxin	23	Case	14
Region found in RelA / SpoT proteins	21	Case	15
Relaxase/Mobilisation nuclease domain	1	Case	1
RelB antitoxin	34	Case	15
Reovirus sigma C capsid protein C-terminal domain	1	Case	1
Replication initiator protein A (RepA) N-terminus	1	Case	1
Resolvase, N terminal domain	8	Case	8
Respiratory nitrate reductase alpha N-terminal	10	Case	9
Respiratory-chain NADH dehydrogenase 51 Kd subunit	3	Case	3
Response regulator receiver domain	73	Case	20
RF-1 domain	15	Case	10
Rhodanese-like domain	9	Case	9
RibD C-terminal domain	14	Case	14
Riboflavin kinase	18	Case	14
Ribonuclease B OB domain	30	Case	19
Ribonuclease E/G family	27	Case	19
Ribonuclease HII	22	Case	18
Ribonuclease III domain	23	Case	15
Ribonuclease P	16	Case	13
Ribonuclease-III-like	17	Case	16
Ribonucleotide reductase, all-alpha domain	18	Case	17
Ribonucleotide reductase, barrel domain	60	Case	28
Ribonucleotide reductase, small chain	36	Case	20
Ribose/Galactose Isomerase	12	Case	7
Ribosomal L18 of archaea, bacteria, mitoch. and chloroplast	14	Case	9
Ribosomal L27 protein	21	Case	12
Ribosomal L28 family	15	Case	10
Ribosomal L29 protein	4	Case	4
Ribosomal L32p protein family	6	Case	4
Ribosomal prokaryotic L21 protein	15	Case	11
Ribosomal protein L10	21	Case	13
Ribosomal protein L11 methyltransferase (PrmA)	22	Case	14
Ribosomal protein L11, N-terminal domain	4	Case	4
Ribosomal protein L11, RNA binding domain	17	Case	13
Ribosomal protein L13	25	Case	16
Ribosomal protein L14p/L23e	17	Case	13
Ribosomal protein L16p/L10e	30	Case	15
Ribosomal protein L17	17	Case	13
Ribosomal protein L19	16	Case	13
Ribosomal protein L1p/L10e family	33	Case	17
Ribosomal protein L20	27	Case	19
Ribosomal protein L22p/L17e	25	Case	18
Ribosomal protein L23	26	Case	15
Ribosomal protein L3	10	Case	6
Ribosomal protein L30p/L7e	15	Case	11
Ribosomal protein L31	13	Case	12
Ribosomal protein L33	10	Case	8
Ribosomal protein L35	17	Case	13
Ribosomal protein L4/L1 family	19	Case	13
Ribosomal protein L5	4	Case	4
Ribosomal protein L6	28	Case	18
Ribosomal protein L7/L12 C-terminal domain	5	Case	5
Ribosomal protein L7/L12 dimerisation domain	18	Case	13
Ribosomal protein L7Ae/L30e/S12e/Gadd45 family	16	Case	16
Ribosomal protein L9, C-terminal domain	15	Case	15
Ribosomal protein L9, N-terminal domain	4	Case	4
Ribosomal protein S10p/S20e	22	Case	12
Ribosomal protein S11	30	Case	18
Ribosomal protein S12/S23	26	Case	18
Ribosomal protein S13/S18	22	Case	12
Ribosomal protein S14p/S29e	17	Case	12
Ribosomal protein S15	4	Case	4
Ribosomal protein S16	18	Case	12
Ribosomal protein S17	5	Case	5
Ribosomal protein S18	15	Case	10
Ribosomal protein S19	20	Case	15
Ribosomal protein S2	34	Case	20
Ribosomal protein S20	17	Case	12
Ribosomal protein S3, C-terminal domain	1	Case	1
Ribosomal protein S4/S9 N-terminal domain	20	Case	16
Ribosomal protein S5, C-terminal domain	28	Case	18
Ribosomal protein S5, N-terminal domain	4	Case	4
Ribosomal protein S6	21	Case	15
Ribosomal protein S7p/S5e	24	Case	18
Ribosomal protein S8	24	Case	16
Ribosomal protein S9/S16	21	Case	16
Ribosomal proteins 50S L24/mitochondrial 39S L24	4	Case	4
Ribosomal proteins 50S-L15, 50S-L18e, 60S-L27A	26	Case	17
Ribosomal Proteins L2, C-terminal domain	18	Case	14
Ribosomal Proteins L2, RNA binding domain	3	Case	3
Ribosomal RNA adenine dimethylase	25	Case	16
Ribosome recycling factor	23	Case	15
Ribosome-binding factor A	22	Case	16
Ribulose-phosphate 3 epimerase family	19	Case	14
RimK-like ATP-grasp domain	4	Case	4
RimM N-terminal domain	24	Case	18
RimP C-terminal SH3 domain	13	Case	13
RimP N-terminal domain	4	Case	4
RIO1 family	4	Case	4
RmlD substrate binding domain	50	Case	22
RNA 2'-O ribose methyltransferase substrate binding	5	Case	4
RNA 2'-phosphotransferase, Tpt1 / KptA family	11	Case	11
RNA cap guanine-N2 methyltransferase	19	Case	17
RNA methyltransferase	20	Case	15
RNA polymerase beta subunit	28	Case	21
RNA polymerase beta subunit external 1 domain	5	Case	5
RNA polymerase Rpb1, domain 2	4	Case	4
RNA polymerase Rpb1, domain 3	9	Case	8
RNA polymerase Rpb1, domain 4	9	Case	8
RNA polymerase Rpb1, domain 5	21	Case	17
RNA polymerase Rpb2, domain 2	1	Case	1
RNA polymerase Rpb2, domain 3	6	Case	6
RNA polymerase Rpb2, domain 7	23	Case	15
RNA polymerase Rpb3/RpoA insert domain	19	Case	19
RNA polymerase Rpb6	2	Case	2
RNA pseudouridylate synthase	107	Case	23
RNA repair pathway DNA polymerase beta family	4	Case	4
Rnf-Nqr subunit, membrane protein	50	Case	18
RnfC Barrel sandwich hybrid domain	5	Case	4
rod shape-determining protein MreC	21	Case	17
ROK family	72	Case	20
rRNA small subunit methyltransferase G	26	Case	14
RsgA GTPase	38	Case	23
RsgA N-terminal domain	1	Case	1
Rubredoxin	14	Case	4
Rubrerythrin	20	Case	14
RuvA N terminal domain	4	Case	4
RuvA, C-terminal domain	14	Case	14
RuvB C-terminal winged helix domain	2	Case	2
S-adenosyl-L-homocysteine hydrolase, NAD binding domain	22	Case	17
S-adenosylmethionine decarboxylase	1	Case	1
S-adenosylmethionine synthetase, C-terminal domain	18	Case	16
S-adenosylmethionine synthetase, central domain	10	Case	5
S-adenosylmethionine synthetase, N-terminal domain	10	Case	10
S-layer homology domain	8	Case	6
S-Ribosylhomocysteinase (LuxS)	11	Case	11
S1 domain	17	Case	13
S1 RNA binding domain	58	Case	23
S4 domain	46	Case	16
SAF domain	8	Case	4
SAICAR synthetase	26	Case	16
SAM-dependent RNA methyltransferase	27	Case	15
SatD family (SatD)	19	Case	15
Scavenger mRNA decapping enzyme C-term binding	17	Case	14
SEC-C motif	2	Case	2
Sec-independent protein translocase protein (TatC)	2	Case	2
SecA DEAD-like domain	32	Case	23
SecA preprotein cross-linking domain	5	Case	5
SecA Wing and Scaffold domain	9	Case	8
SecD/SecF GG Motif	2	Case	2
SecE/Sec61-gamma subunits of protein translocation complex	13	Case	10
Secretory protein of YscJ/FliF family	1	Case	1
SecY translocase	33	Case	22
Segregation and condensation complex subunit ScpB	19	Case	15
Segregation and condensation protein ScpA	23	Case	20
Sel1 repeat	5	Case	5
SelR domain	1	Case	1
Semialdehyde dehydrogenase, dimerisation domain	9	Case	7
Semialdehyde dehydrogenase, NAD binding domain	8	Case	5
Sensory domain found in PocR	18	Case	15
Septum formation inhibitor MinC, C-terminal domain	28	Case	17
Septum formation initiator	13	Case	12
Septum formation topological specificity factor MinE	12	Case	9
Serine aminopeptidase, S33	10	Case	5
Serine dehydratase alpha chain	54	Case	25
Serine dehydratase beta chain	13	Case	4
Seryl-tRNA synthetase N-terminal domain	5	Case	5
Shikimate / quinate 5-dehydrogenase	8	Case	4
Shikimate dehydrogenase substrate binding domain	23	Case	18
Shikimate kinase	22	Case	14
short chain dehydrogenase	26	Case	16
Short chain fatty acid transporter	35	Case	21
Short repeat of unknown function (DUF308)	12	Case	12
SHS2 domain inserted in FTSA	14	Case	14
Sigma 54 modulation protein / S30EA ribosomal protein	2	Case	2
Sigma 54 modulation/S30EA ribosomal protein C terminus	19	Case	15
Sigma-54 factor, core binding domain	14	Case	14
Sigma-54 interaction domain	78	Case	23
Sigma-54, DNA binding domain	9	Case	6
Sigma-70 factor, region 1.2	1	Case	1
Sigma-70 region 2	59	Case	16
Sigma-70 region 3	19	Case	17
Sigma-70, region 4	20	Case	9
SigmaW regulon antibacterial	2	Case	2
Signal peptidase (SPase) II	24	Case	15
Signal peptidase, peptidase S26	9	Case	9
Signal peptide binding domain	2	Case	2
Signal recognition particle receptor beta subunit	1	Case	1
Single-strand binding protein family	17	Case	13
Sir2 family	17	Case	13
SIR2-like domain	20	Case	15
SIS domain	126	Case	24
SLBB domain	30	Case	19
Small integral membrane protein (DUF2273)	15	Case	13
SMC proteins Flexible Hinge Domain	6	Case	6
SMI1 / KNR4 family (SUKH-1)	2	Case	2
SMI1-KNR4 cell-wall	15	Case	14
SmpB protein	22	Case	14
Smr domain	25	Case	22
SNARE associated Golgi protein	2	Case	2
SNF2 family N-terminal domain	14	Case	13
SNO glutamine amidotransferase family	4	Case	4
Sodium Bile acid symporter family	4	Case	4
Sodium:alanine symporter family	152	Case	29
Sodium:dicarboxylate symporter family	85	Case	26
Sodium:neurotransmitter symporter family	70	Case	23
Sodium:solute symporter family	89	Case	30
Sodium:sulfate symporter transmembrane region	29	Case	18
Sodium/glutamate symporter	105	Case	22
Sodium/hydrogen exchanger family	22	Case	18
SOR/SNZ family	18	Case	16
Spermidine synthase tetramerisation domain	1	Case	1
SPFH domain / Band 7 family	46	Case	22
SpoIVB peptidase S55	3	Case	3
Sporulation and spore germination	4	Case	4
SpoU rRNA Methylase family	57	Case	20
SpoVG	17	Case	13
SRP54-type protein, GTPase domain	24	Case	16
SRP54-type protein, helical bundle domain	2	Case	2
SseB protein N-terminal domain	15	Case	15
Stage II sporulation protein	24	Case	19
Stage II sporulation protein E (SpoIIE)	6	Case	4
Stage V sporulation protein AD (SpoVAD)	14	Case	14
Staphylococcal nuclease homologue	4	Case	4
Staphylopine dehydrogenase	4	Case	4
Starch synthase catalytic domain	16	Case	15
STAS domain	18	Case	16
STAS-like domain of unknown function (DUF4325)	10	Case	6
Sterol carrier protein domain	25	Case	12
Substrate binding domain of ABC-type glycine betaine transport system	39	Case	19
Subtilase family	37	Case	20
Subunit ChlI of Mg-chelatase	18	Case	18
Succinylglutamate desuccinylase / Aspartoacylase family	14	Case	5
Sucrose-6F-phosphate phosphohydrolase	33	Case	17
Sugar (and other) transporter	11	Case	8
Sugar efflux transporter for intercellular exchange	8	Case	8
Sugar fermentation stimulation protein RE domain	4	Case	4
Sugar transport protein	22	Case	17
Sugar-binding N-terminal domain	10	Case	6
Sulfatase	17	Case	8
Sulfatase-modifying factor enzyme 1	17	Case	10
Sulfite exporter TauE/SafE	38	Case	18
Sulfurtransferase TusA	4	Case	4
Suppressor of fused protein (SUFU)	6	Case	5
SurA N-terminal domain	5	Case	4
Surface antigen	27	Case	17
Surface antigen variable number repeat	7	Case	7
Survival protein SurE	1	Case	1
SWIM zinc finger	5	Case	4
TamB, inner membrane protein subunit of TAM complex	18	Case	18
TatD related DNase	23	Case	18
TcdA/TcdB catalytic glycosyltransferase domain	4	Case	4
TCP-1/cpn60 chaperonin family	41	Case	23
Telomere recombination	34	Case	20
Tetraacyldisaccharide-1-P 4'-kinase	32	Case	21
Tetracyclin repressor-like, C-terminal domain	14	Case	14
Tetrahydrodipicolinate succinyltransferase N-terminal	4	Case	4
Tetrahydrofolate dehydrogenase/cyclohydrolase, catalytic domain	21	Case	16
Tetrahydrofolate dehydrogenase/cyclohydrolase, NAD(P)-binding domain	9	Case	9
Tetrapyrrole (Corrin/Porphyrin) Methylases	122	Case	23
Tetratricopeptide repeat	234	Case	32
Tex protein YqgF-like domain	1	Case	1
Tex-like protein N-terminal domain	26	Case	19
TGS domain	4	Case	3
Thermophilic metalloprotease (M29)	11	Case	7
Thi4 family	21	Case	18
Thiamin pyrophosphokinase, catalytic domain	13	Case	12
Thiamin pyrophosphokinase, vitamin B1 binding domain	4	Case	4
Thiamine biosynthesis protein (ThiI)	31	Case	18
Thiamine monophosphate synthase	46	Case	14
Thiamine pyrophosphate enzyme, C-terminal TPP binding domain	11	Case	6
Thiamine pyrophosphate enzyme, N-terminal TPP binding domain	7	Case	6
Thiamine-binding protein	4	Case	4
Thiazole biosynthesis protein ThiG	27	Case	14
ThiF family	49	Case	18
ThiJ/PfpI family-like	1	Case	1
Thioesterase superfamily	5	Case	5
Thioesterase-like superfamily	17	Case	13
Thiolase, C-terminal domain	12	Case	7
Thiolase, N-terminal domain	30	Case	17
Thioredoxin	30	Case	16
Thioredoxin domain	29	Case	19
Thioredoxin-like	7	Case	4
Thioredoxin-like [2Fe-2S] ferredoxin	10	Case	6
Thioredoxin-like domain	17	Case	14
Threonine synthase N terminus	5	Case	5
Threonine/Serine exporter, ThrE	26	Case	14
Threonyl and Alanyl tRNA synthetase second additional domain	45	Case	20
Threonylcarbamoyl adenosine biosynthesis protein TsaE	18	Case	14
Thymidylate kinase	6	Case	6
Thymidylate synthase	25	Case	14
TilS substrate C-terminal domain	7	Case	6
TIP49 P-loop domain	4	Case	4
TOBE domain	48	Case	21
TonB C terminal	1	Case	1
TonB dependent receptor	59	Case	29
TonB-dependent Receptor Plug Domain	57	Case	16
Toprim domain	61	Case	23
Toprim-like	19	Case	19
TPM domain	1	Case	1
TPR repeat	21	Case	17
TRAM domain	21	Case	17
Transcription termination factor nusG	20	Case	15
Transcriptional regulator	79	Case	20
Transcriptional regulator PadR-like family	15	Case	13
Transcriptional regulatory protein, C terminal	60	Case	18
Transglycosylase	27	Case	21
Transglycosylase associated protein	14	Case	14
Transglycosylase SLT domain	9	Case	9
Transition state regulatory protein AbrB	22	Case	14
Transketolase, C-terminal domain	62	Case	23
Transketolase, pyrimidine binding domain	3	Case	3
Transketolase, thiamine diphosphate binding domain	5	Case	5
Translation initiation factor 1A / IF-1	14	Case	12
Translation initiation factor IF-2, N-terminal region	26	Case	20
Translation initiation factor IF-3, C-terminal domain	9	Case	5
Translation initiation factor IF-3, N-terminal domain	18	Case	15
Translation-initiation factor 2	6	Case	5
Transporter associated domain	13	Case	9
Transposase	3	Case	3
Transposase DDE domain	9	Case	7
Transposase zinc-binding domain	4	Case	4
Transposase, Mutator family	22	Case	20
TRCF domain	3	Case	3
Triose-phosphate Transporter family	4	Case	4
Triosephosphate isomerase	28	Case	16
Tripartite ATP-independent periplasmic transporter, DctM component	61	Case	21
Tripartite ATP-independent periplasmic transporters, DctQ component	32	Case	15
Tripartite tricarboxylate transporter family receptor	26	Case	11
Tripartite tricarboxylate transporter TctA family	36	Case	13
Tripartite tricarboxylate transporter TctB family	16	Case	5
TrkA-C domain	58	Case	25
TrkA-N domain	6	Case	4
tRNA (Guanine-1)-methyltransferase	25	Case	16
tRNA (Uracil-5-)-methyltransferase	33	Case	15
tRNA methyl transferase	12	Case	10
tRNA nucleotidyltransferase domain 2 putative	19	Case	10
tRNA pseudouridine synthase	19	Case	14
tRNA pseudouridylate synthase B C-terminal domain	4	Case	4
tRNA synthetase B5 domain	22	Case	20
tRNA synthetase class II core domain (G, H, P, S and T)	65	Case	23
tRNA synthetases class I (C) catalytic domain	60	Case	24
tRNA synthetases class I (E and Q), catalytic domain	41	Case	26
tRNA synthetases class I (I, L, M and V)	58	Case	25
tRNA synthetases class I (M)	50	Case	26
tRNA synthetases class I (R)	16	Case	15
tRNA synthetases class I (W and Y)	51	Case	19
tRNA synthetases class II (A)	42	Case	27
tRNA synthetases class II (D, K and N)	33	Case	16
tRNA synthetases class II core domain (F)	14	Case	7
TruB family pseudouridylate synthase (N terminal domain)	19	Case	18
TSCPD domain	11	Case	4
Tubulin/FtsZ family, GTPase domain	20	Case	16
twin BRCT domain	1	Case	1
Type I GTP cyclohydrolase folE2	1	Case	1
Type I phosphodiesterase / nucleotide pyrophosphatase	9	Case	5
Type I restriction enzyme R protein N terminus (HSDR_N)	17	Case	14
Type I restriction modification DNA specificity domain	2	Case	2
Type II secretion system (T2SS), protein F	30	Case	18
Type II/IV secretion system protein	92	Case	25
Type III flagellar switch regulator (C-ring) FliN C-term	1	Case	1
Type III pantothenate kinase	17	Case	12
Type III restriction enzyme, res subunit	108	Case	28
Type IV leader peptidase family	16	Case	12
Type IV pilus assembly protein PilM;	4	Case	4
UAA transporter family	4	Case	4
UbiA prenyltransferase family	17	Case	17
ubiE/COQ5 methyltransferase family	4	Case	4
Udp N-acetylglucosamine O-acyltransferase; Domain 2	19	Case	17
UDP-3-O-[3-hydroxymyristoyl] glucosamine N-acyltransferase, LpxD	19	Case	18
UDP-3-O-acyl N-acetylglycosamine deacetylase	25	Case	16
UDP-glucose/GDP-mannose dehydrogenase family, central domain	9	Case	5
UDP-glucose/GDP-mannose dehydrogenase family, UDP binding domain	2	Case	2
UDP-N-acetylenolpyruvoylglucosamine reductase, C-terminal domain	20	Case	14
UDP-N-acetylglucosamine 2-epimerase	10	Case	6
Uncharacterised 5xTM membrane BCR, YitT family COG1284	8	Case	6
Uncharacterised ACR (DUF711)	8	Case	8
Uncharacterised conserved protein (DUF2156)	33	Case	16
Uncharacterised protein conserved in bacteria (DUF2194)	11	Case	11
Uncharacterised protein family UPF0052	7	Case	7
Uncharacterised protein family UPF0102	19	Case	15
Uncharacterised protein, DegV family COG1307	4	Case	4
Uncharacterized BCR, YaiI/YqxD family COG1671	3	Case	3
Uncharacterized conserved protein (DUF2075)	4	Case	4
Uncharacterized protein conserved in bacteria (DUF2147)	2	Case	2
Uncharacterized protein conserved in bacteria (DUF2179)	18	Case	15
Uncharacterized protein conserved in bacteria (DUF2262)	31	Case	17
Uncharacterized protein conserved in bacteria (DUF2344)	9	Case	9
Uncharacterized protein family (UPF0051)	2	Case	1
Uncharacterized protein family UPF0004	28	Case	18
Uncharacterized protein family UPF0029	18	Case	14
Uncharacterized protein family UPF0054	17	Case	13
Uracil DNA glycosylase superfamily	52	Case	16
Uracil phosphoribosyltransferase	5	Case	5
Urocanase C-terminal domain	28	Case	22
Urocanase N-terminal domain	7	Case	5
Urocanase Rossmann-like domain	1	Case	1
Uroporphyrinogen-III synthase HemD	24	Case	16
UTRA domain	17	Case	5
UvrB/uvrC motif	6	Case	6
UvrC Helix-hairpin-helix N-terminal	6	Case	6
UvrD-like helicase C-terminal domain	63	Case	25
UvrD/REP helicase N-terminal domain	27	Case	19
V-type ATPase 116kDa subunit family	21	Case	19
Valyl tRNA synthetase tRNA binding arm	11	Case	10
Viral (Superfamily 1) RNA helicase	1	Case	1
Virulence factor BrkB	21	Case	17
Virulence protein RhuM family	1	Case	1
VIT family	4	Case	4
Voltage gated chloride channel	18	Case	18
Voltage-dependent anion channel	4	Case	4
von Willebrand factor type A domain	20	Case	7
VWA domain containing CoxE-like protein	22	Case	14
VWA-like domain (DUF2201)	2	Case	2
WG containing repeat	4	Case	4
WGR domain	12	Case	12
WhiA C-terminal HTH domain	1	Case	1
WhiA LAGLIDADG-like domain	18	Case	13
Winged helix DNA-binding domain	4	Case	4
Winged helix-turn-helix DNA-binding	8	Case	4
Winged helix-turn-helix transcription repressor, HrcA DNA-binding	3	Case	3
WYL domain	48	Case	17
X-Pro dipeptidyl-peptidase (S15 family)	5	Case	4
XdhC and CoxI family	5	Case	5
Xylose isomerase-like TIM barrel	47	Case	16
YacP-like NYN domain	1	Case	1
YadA-like membrane anchor domain	54	Case	33
YARHG domain	26	Case	17
YbaB/EbfC DNA-binding family	20	Case	15
YbbR-like protein	1	Case	1
YcaO cyclodehydratase, ATP-ad Mg2+-binding	1	Case	1
YceG-like family	22	Case	16
YcxB-like protein	11	Case	4
YdjC-like protein	1	Case	1
YgbB family	17	Case	11
YGGT family	9	Case	8
YhcG PDDEXK nuclease domain	17	Case	14
YhcH/YjgK/YiaL	17	Case	13
YheC/D like ATP-grasp	1	Case	1
YibE/F-like protein	37	Case	19
YicC-like family, N-terminal region	21	Case	17
YjbR	7	Case	7
YjeF-related protein N-terminus	1	Case	1
YmdB-like protein	28	Case	18
YoeB-like toxin of bacterial type II toxin-antitoxin system	25	Case	15
YopX protein	1	Case	1
YqaJ-like viral recombinase domain	2	Case	2
YtxH-like protein	15	Case	15
Zinc finger found in FPG and IleRS	22	Case	19
Zinc-binding dehydrogenase	5	Case	5
zinc-ribbon family	4	Case	4
Zinc-uptake complex component A periplasmic	84	Case	25
ZIP Zinc transporter	9	Case	5
Zn-dependent metallo-hydrolase RNA specificity domain	1	Case	1
0	22	Case	14
