# Supplementary material for: Multi-omics analyses reveal multimodal Fusobacterium DNA damage perturbations in colorectal cancer
Source: Research Square preprint supplement (doi:10.21203/rs.3.rs-1642872/v1), 2022-05-25
Supplement: Supplementary file 2 [file 84d33d7894f7c939bfe34b3e.csv]

Supplementary Table 5: Comparisons of several genomic scars between Fusobacterium-positive and Fusobacterium-negative CRCs
Genomic Scars	Fusobacterium status	Median	Mean	N	Min	Max	p	p.adj	p.adj.signif
ai1	Negative	5	5.591194969	477	0	27	0.042	0.096	ns
ai1	Positive	4	4.823076923	130	0	23	0.042	0.096	ns
AS	Negative	12	12.81619256	457	0	31	0.00536	0.04288	*
AS	Positive	10	10.47244094	127	0	30	0.00536	0.04288	*
ASprime	Negative	15	17.33698031	457	0	67	0.0387	0.096	ns
ASprime	Positive	11	15.18110236	127	0	73	0.0387	0.096	ns
Cancer.DNA.fraction	Negative	0.715	0.689306723	476	0.17	1	0.175	0.244	ns
Cancer.DNA.fraction	Positive	0.725	0.712076923	130	0.28	0.94	0.175	0.244	ns
Genome.doublings	Negative	0	0.489495798	476	0	2	0.0167	0.08768	ns
Genome.doublings	Positive	0	0.369230769	130	0	2	0.0167	0.08768	ns
HRD	Negative	12	13.08805031	477	0	64	0.0842	0.149688889	ns
HRD	Positive	10	11.64615385	130	0	50	0.0842	0.149688889	ns
hrd.loh	Negative	3	3.469601677	477	0	17	0.0666	0.1332	ns
hrd.loh	Positive	2	2.984615385	130	0	11	0.0666	0.1332	ns
LOH_frac_altered	Negative	0.133536485	0.142661116	457	0	0.517163627	0.2	0.246153846	ns
LOH_frac_altered	Positive	0.121331592	0.129233305	127	0.000114306	0.43278145	0.2	0.246153846	ns
LOH_n_seg	Negative	18	23.36761488	457	0	121	0.404	0.439466667	ns
LOH_n_seg	Positive	17	20.83464567	127	2	87	0.404	0.439466667	ns
lst1	Negative	3	4.027253669	477	0	28	0.183	0.244	ns
lst1	Positive	3	3.838461538	130	0	33	0.183	0.244	ns
Non.silent.per.Mb	Negative	2.695193245	8.549580363	410	0	252.4305455	0.412	0.439466667	ns
Non.silent.per.Mb	Positive	2.874860145	13.85017668	78	0	353.4896639	0.412	0.439466667	ns
ploidy	Negative	2.27	2.649516807	476	1.72	6.25	0.0274	0.08768	ns
ploidy	Positive	2.14	2.498461538	130	1.69	4.39	0.0274	0.08768	ns
purity	Negative	0.66	0.639369748	476	0.17	1	0.0258	0.08768	ns
purity	Positive	0.69	0.675692308	130	0.23	0.94	0.0258	0.08768	ns
Silent.per.Mb	Negative	0.947120856	2.757367077	410	0	58.89418386	0.881	0.881	ns
Silent.per.Mb	Positive	1.012497675	3.955617568	78	0	81.22102652	0.881	0.881	ns
Subclonal.genome.fraction	Negative	0.1	0.141741176	425	0	0.71	0.109	0.1744	ns
Subclonal.genome.fraction	Positive	0.08	0.124807692	104	0	0.63	0.109	0.1744	ns
