# Supplementary material for: Multi-omics analyses reveal multimodal Fusobacterium DNA damage perturbations in colorectal cancer
Source: Research Square preprint supplement (doi:10.21203/rs.3.rs-1642872/v1), 2022-05-25
Supplement: Supplementary file 3 [file d3433e0e424bc2dd302adc18.csv]

Supplementary Table 4: The number of single nucleotide variations that are significantly more prevalent in genes from CRC tumours with integrated Fusobacterium versus Fusobacterium-positive and Fusobacterium-negative tumours combined
Hugo_Symbol	Group1	Group2	n_mutated_group1	n_mutated_group2	p_value	OR	OR_low	OR_high	fdr
TTC13	Fusobacterium-Integrated CRC genomes	Fuso +VE and Fuso -VE CRCs	7 of 30	4 of 475	3.57E-07	34.99047713	8.227799111	175.2607463	0.008237338
TSC22D2	Fusobacterium-Integrated CRC genomes	Fuso +VE and Fuso -VE CRCs	6 of 30	2 of 475	6.83E-07	57.37155981	9.647989574	605.1650774	0.008237338
SP140	Fusobacterium-Integrated CRC genomes	Fuso +VE and Fuso -VE CRCs	9 of 30	13 of 475	7.80E-07	15.00871258	5.0710562	43.21591835	0.008237338
LBR	Fusobacterium-Integrated CRC genomes	Fuso +VE and Fuso -VE CRCs	7 of 30	5 of 475	8.23E-07	27.99772012	7.054686804	121.5044383	0.008237338
ARHGEF26	Fusobacterium-Integrated CRC genomes	Fuso +VE and Fuso -VE CRCs	9 of 30	16 of 475	2.85E-06	12.14213697	4.222830342	33.49306175	0.02023789
LACE1	Fusobacterium-Integrated CRC genomes	Fuso +VE and Fuso -VE CRCs	5 of 30	1 of 475	3.05E-06	91.97665777	9.774719656	4350.440408	0.02023789
DROSHA	Fusobacterium-Integrated CRC genomes	Fuso +VE and Fuso -VE CRCs	9 of 30	17 of 475	4.18E-06	11.41212213	3.998561291	31.13145737	0.02023789
GRID2	Fusobacterium-Integrated CRC genomes	Fuso +VE and Fuso -VE CRCs	9 of 30	17 of 475	4.18E-06	11.41212213	3.998561291	31.13145737	0.02023789
MYH9	Fusobacterium-Integrated CRC genomes	Fuso +VE and Fuso -VE CRCs	10 of 30	24 of 475	5.81E-06	9.306128765	3.494140329	23.72411393	0.02023789
CSDE1	Fusobacterium-Integrated CRC genomes	Fuso +VE and Fuso -VE CRCs	7 of 30	8 of 475	5.90E-06	17.48696716	4.94327581	60.74349304	0.02023789
TRIM6	Fusobacterium-Integrated CRC genomes	Fuso +VE and Fuso -VE CRCs	7 of 30	8 of 475	5.90E-06	17.48696716	4.94327581	60.74349304	0.02023789
SMPD1	Fusobacterium-Integrated CRC genomes	Fuso +VE and Fuso -VE CRCs	6 of 30	5 of 475	9.94E-06	23.04761235	5.442871569	102.8854562	0.02023789
MBOAT2	Fusobacterium-Integrated CRC genomes	Fuso +VE and Fuso -VE CRCs	6 of 30	5 of 475	9.94E-06	23.04761235	5.442871569	102.8854562	0.02023789
DNM1	Fusobacterium-Integrated CRC genomes	Fuso +VE and Fuso -VE CRCs	7 of 30	9 of 475	1.01E-05	15.51931357	4.494169333	51.78946962	0.02023789
ZNF431	Fusobacterium-Integrated CRC genomes	Fuso +VE and Fuso -VE CRCs	7 of 30	9 of 475	1.01E-05	15.51931357	4.494169333	51.78946962	0.02023789
BCL9	Fusobacterium-Integrated CRC genomes	Fuso +VE and Fuso -VE CRCs	11 of 30	33 of 475	1.02E-05	7.69346483	3.042140725	18.76060506	0.02023789
TRIM13	Fusobacterium-Integrated CRC genomes	Fuso +VE and Fuso -VE CRCs	4 of 30	0 of 475	1.02E-05	Inf	11.22535774	Inf	0.02023789
HOXC12	Fusobacterium-Integrated CRC genomes	Fuso +VE and Fuso -VE CRCs	4 of 30	0 of 475	1.02E-05	Inf	11.22535774	Inf	0.02023789
FAM134B	Fusobacterium-Integrated CRC genomes	Fuso +VE and Fuso -VE CRCs	5 of 30	2 of 475	1.02E-05	46.07186796	7.129160468	503.4762282	0.02023789
MBD3L1	Fusobacterium-Integrated CRC genomes	Fuso +VE and Fuso -VE CRCs	5 of 30	2 of 475	1.02E-05	46.07186796	7.129160468	503.4762282	0.02023789
TTC37	Fusobacterium-Integrated CRC genomes	Fuso +VE and Fuso -VE CRCs	8 of 30	14 of 475	1.07E-05	11.82461103	3.879005046	34.21206432	0.02023789
GRIP1	Fusobacterium-Integrated CRC genomes	Fuso +VE and Fuso -VE CRCs	7 of 30	10 of 475	1.64E-05	13.95462243	4.118340625	45.08846882	0.02023789
IGF2BP1	Fusobacterium-Integrated CRC genomes	Fuso +VE and Fuso -VE CRCs	7 of 30	10 of 475	1.64E-05	13.95462243	4.118340625	45.08846882	0.02023789
TMTC1	Fusobacterium-Integrated CRC genomes	Fuso +VE and Fuso -VE CRCs	7 of 30	10 of 475	1.64E-05	13.95462243	4.118340625	45.08846882	0.02023789
ADCY7	Fusobacterium-Integrated CRC genomes	Fuso +VE and Fuso -VE CRCs	7 of 30	10 of 475	1.64E-05	13.95462243	4.118340625	45.08846882	0.02023789
NCKAP1	Fusobacterium-Integrated CRC genomes	Fuso +VE and Fuso -VE CRCs	7 of 30	10 of 475	1.64E-05	13.95462243	4.118340625	45.08846882	0.02023789
ZNF780B	Fusobacterium-Integrated CRC genomes	Fuso +VE and Fuso -VE CRCs	6 of 30	6 of 475	1.90E-05	19.21238552	4.757141434	78.01172303	0.02023789
SUSD4	Fusobacterium-Integrated CRC genomes	Fuso +VE and Fuso -VE CRCs	6 of 30	6 of 475	1.90E-05	19.21238552	4.757141434	78.01172303	0.02023789
ZNF267	Fusobacterium-Integrated CRC genomes	Fuso +VE and Fuso -VE CRCs	6 of 30	6 of 475	1.90E-05	19.21238552	4.757141434	78.01172303	0.02023789
MLF1IP	Fusobacterium-Integrated CRC genomes	Fuso +VE and Fuso -VE CRCs	6 of 30	6 of 475	1.90E-05	19.21238552	4.757141434	78.01172303	0.02023789
CCDC11	Fusobacterium-Integrated CRC genomes	Fuso +VE and Fuso -VE CRCs	6 of 30	6 of 475	1.90E-05	19.21238552	4.757141434	78.01172303	0.02023789
KRT39	Fusobacterium-Integrated CRC genomes	Fuso +VE and Fuso -VE CRCs	6 of 30	6 of 475	1.90E-05	19.21238552	4.757141434	78.01172303	0.02023789
KNG1	Fusobacterium-Integrated CRC genomes	Fuso +VE and Fuso -VE CRCs	6 of 30	6 of 475	1.90E-05	19.21238552	4.757141434	78.01172303	0.02023789
ZNF625	Fusobacterium-Integrated CRC genomes	Fuso +VE and Fuso -VE CRCs	6 of 30	6 of 475	1.90E-05	19.21238552	4.757141434	78.01172303	0.02023789
BSN	Fusobacterium-Integrated CRC genomes	Fuso +VE and Fuso -VE CRCs	11 of 30	37 of 475	2.57E-05	6.805442898	2.712262015	16.41752093	0.021841824
CLTC	Fusobacterium-Integrated CRC genomes	Fuso +VE and Fuso -VE CRCs	7 of 30	11 of 475	2.58E-05	12.66916127	3.800852233	39.88639232	0.021841824
KIF5A	Fusobacterium-Integrated CRC genomes	Fuso +VE and Fuso -VE CRCs	7 of 30	11 of 475	2.58E-05	12.66916127	3.800852233	39.88639232	0.021841824
SH3PXD2B	Fusobacterium-Integrated CRC genomes	Fuso +VE and Fuso -VE CRCs	7 of 30	11 of 475	2.58E-05	12.66916127	3.800852233	39.88639232	0.021841824
DKK1	Fusobacterium-Integrated CRC genomes	Fuso +VE and Fuso -VE CRCs	5 of 30	3 of 475	2.62E-05	30.7595334	5.633241009	209.2286691	0.021841824
RWDD2B	Fusobacterium-Integrated CRC genomes	Fuso +VE and Fuso -VE CRCs	5 of 30	3 of 475	2.62E-05	30.7595334	5.633241009	209.2286691	0.021841824
FAM170A	Fusobacterium-Integrated CRC genomes	Fuso +VE and Fuso -VE CRCs	5 of 30	3 of 475	2.62E-05	30.7595334	5.633241009	209.2286691	0.021841824
CDK19	Fusobacterium-Integrated CRC genomes	Fuso +VE and Fuso -VE CRCs	5 of 30	3 of 475	2.62E-05	30.7595334	5.633241009	209.2286691	0.021841824
CYP3A4	Fusobacterium-Integrated CRC genomes	Fuso +VE and Fuso -VE CRCs	5 of 30	3 of 475	2.62E-05	30.7595334	5.633241009	209.2286691	0.021841824
YTHDC2	Fusobacterium-Integrated CRC genomes	Fuso +VE and Fuso -VE CRCs	8 of 30	17 of 475	3.20E-05	9.69563686	3.259849682	27.00613098	0.024255311
CNGB3	Fusobacterium-Integrated CRC genomes	Fuso +VE and Fuso -VE CRCs	8 of 30	17 of 475	3.20E-05	9.69563686	3.259849682	27.00613098	0.024255311
TAS1R1	Fusobacterium-Integrated CRC genomes	Fuso +VE and Fuso -VE CRCs	6 of 30	7 of 475	3.39E-05	16.44799765	4.224509092	62.23963842	0.024255311
FKBP9	Fusobacterium-Integrated CRC genomes	Fuso +VE and Fuso -VE CRCs	6 of 30	7 of 475	3.39E-05	16.44799765	4.224509092	62.23963842	0.024255311
ZBTB11	Fusobacterium-Integrated CRC genomes	Fuso +VE and Fuso -VE CRCs	6 of 30	7 of 475	3.39E-05	16.44799765	4.224509092	62.23963842	0.024255311
RNF150	Fusobacterium-Integrated CRC genomes	Fuso +VE and Fuso -VE CRCs	6 of 30	7 of 475	3.39E-05	16.44799765	4.224509092	62.23963842	0.024255311
ME2	Fusobacterium-Integrated CRC genomes	Fuso +VE and Fuso -VE CRCs	6 of 30	7 of 475	3.39E-05	16.44799765	4.224509092	62.23963842	0.024255311
CCDC64	Fusobacterium-Integrated CRC genomes	Fuso +VE and Fuso -VE CRCs	6 of 30	7 of 475	3.39E-05	16.44799765	4.224509092	62.23963842	0.024255311
MPHOSPH9	Fusobacterium-Integrated CRC genomes	Fuso +VE and Fuso -VE CRCs	7 of 30	12 of 475	3.91E-05	11.59771612	3.527243736	35.68798712	0.025265988
ZNF616	Fusobacterium-Integrated CRC genomes	Fuso +VE and Fuso -VE CRCs	7 of 30	12 of 475	3.91E-05	11.59771612	3.527243736	35.68798712	0.025265988
SFI1	Fusobacterium-Integrated CRC genomes	Fuso +VE and Fuso -VE CRCs	7 of 30	12 of 475	3.91E-05	11.59771612	3.527243736	35.68798712	0.025265988
PLXDC2	Fusobacterium-Integrated CRC genomes	Fuso +VE and Fuso -VE CRCs	7 of 30	12 of 475	3.91E-05	11.59771612	3.527243736	35.68798712	0.025265988
ACVR1B	Fusobacterium-Integrated CRC genomes	Fuso +VE and Fuso -VE CRCs	8 of 30	18 of 475	4.44E-05	9.141736473	3.093717016	25.23884899	0.026265164
ZNF835	Fusobacterium-Integrated CRC genomes	Fuso +VE and Fuso -VE CRCs	8 of 30	18 of 475	4.44E-05	9.141736473	3.093717016	25.23884899	0.026265164
DLEC1	Fusobacterium-Integrated CRC genomes	Fuso +VE and Fuso -VE CRCs	8 of 30	18 of 475	4.44E-05	9.141736473	3.093717016	25.23884899	0.026265164
ABCB11	Fusobacterium-Integrated CRC genomes	Fuso +VE and Fuso -VE CRCs	8 of 30	18 of 475	4.44E-05	9.141736473	3.093717016	25.23884899	0.026265164
TRMT11	Fusobacterium-Integrated CRC genomes	Fuso +VE and Fuso -VE CRCs	4 of 30	1 of 475	4.90E-05	70.76642957	6.709644681	3506.2242	0.026265164
TSPYL1	Fusobacterium-Integrated CRC genomes	Fuso +VE and Fuso -VE CRCs	4 of 30	1 of 475	4.90E-05	70.76642957	6.709644681	3506.2242	0.026265164
SMAP2	Fusobacterium-Integrated CRC genomes	Fuso +VE and Fuso -VE CRCs	4 of 30	1 of 475	4.90E-05	70.76642957	6.709644681	3506.2242	0.026265164
ZNF19	Fusobacterium-Integrated CRC genomes	Fuso +VE and Fuso -VE CRCs	5 of 30	4 of 475	5.64E-05	23.10239617	4.662012806	123.7089008	0.026265164
LEPREL1	Fusobacterium-Integrated CRC genomes	Fuso +VE and Fuso -VE CRCs	5 of 30	4 of 475	5.64E-05	23.10239617	4.662012806	123.7089008	0.026265164
FAM115C	Fusobacterium-Integrated CRC genomes	Fuso +VE and Fuso -VE CRCs	5 of 30	4 of 475	5.64E-05	23.10239617	4.662012806	123.7089008	0.026265164
SLC25A17	Fusobacterium-Integrated CRC genomes	Fuso +VE and Fuso -VE CRCs	5 of 30	4 of 475	5.64E-05	23.10239617	4.662012806	123.7089008	0.026265164
CYP2E1	Fusobacterium-Integrated CRC genomes	Fuso +VE and Fuso -VE CRCs	5 of 30	4 of 475	5.64E-05	23.10239617	4.662012806	123.7089008	0.026265164
HPS5	Fusobacterium-Integrated CRC genomes	Fuso +VE and Fuso -VE CRCs	5 of 30	4 of 475	5.64E-05	23.10239617	4.662012806	123.7089008	0.026265164
OR13C9	Fusobacterium-Integrated CRC genomes	Fuso +VE and Fuso -VE CRCs	5 of 30	4 of 475	5.64E-05	23.10239617	4.662012806	123.7089008	0.026265164
SLC6A4	Fusobacterium-Integrated CRC genomes	Fuso +VE and Fuso -VE CRCs	5 of 30	4 of 475	5.64E-05	23.10239617	4.662012806	123.7089008	0.026265164
RAG1	Fusobacterium-Integrated CRC genomes	Fuso +VE and Fuso -VE CRCs	6 of 30	8 of 475	5.69E-05	14.38351486	3.798486871	51.805664	0.026265164
TBK1	Fusobacterium-Integrated CRC genomes	Fuso +VE and Fuso -VE CRCs	6 of 30	8 of 475	5.69E-05	14.38351486	3.798486871	51.805664	0.026265164
USP6NL	Fusobacterium-Integrated CRC genomes	Fuso +VE and Fuso -VE CRCs	6 of 30	8 of 475	5.69E-05	14.38351486	3.798486871	51.805664	0.026265164
OR4K15	Fusobacterium-Integrated CRC genomes	Fuso +VE and Fuso -VE CRCs	6 of 30	8 of 475	5.69E-05	14.38351486	3.798486871	51.805664	0.026265164
PCDHB16	Fusobacterium-Integrated CRC genomes	Fuso +VE and Fuso -VE CRCs	6 of 30	8 of 475	5.69E-05	14.38351486	3.798486871	51.805664	0.026265164
CEP104	Fusobacterium-Integrated CRC genomes	Fuso +VE and Fuso -VE CRCs	6 of 30	8 of 475	5.69E-05	14.38351486	3.798486871	51.805664	0.026265164
ZNF251	Fusobacterium-Integrated CRC genomes	Fuso +VE and Fuso -VE CRCs	6 of 30	8 of 475	5.69E-05	14.38351486	3.798486871	51.805664	0.026265164
RICTOR	Fusobacterium-Integrated CRC genomes	Fuso +VE and Fuso -VE CRCs	7 of 30	13 of 475	5.77E-05	10.6928985	3.289642198	32.31713433	0.026265164
SRGAP1	Fusobacterium-Integrated CRC genomes	Fuso +VE and Fuso -VE CRCs	7 of 30	13 of 475	5.77E-05	10.6928985	3.289642198	32.31713433	0.026265164
CCDC178	Fusobacterium-Integrated CRC genomes	Fuso +VE and Fuso -VE CRCs	8 of 30	19 of 475	6.05E-05	8.645820236	2.943150847	23.64702598	0.027242294
MYT1	Fusobacterium-Integrated CRC genomes	Fuso +VE and Fuso -VE CRCs	8 of 30	20 of 475	8.13E-05	8.19921626	2.806454135	22.26314763	0.032787936
CCDC80	Fusobacterium-Integrated CRC genomes	Fuso +VE and Fuso -VE CRCs	7 of 30	14 of 475	8.30E-05	9.914452037	3.08171953	29.51028248	0.032787936
TNPO1	Fusobacterium-Integrated CRC genomes	Fuso +VE and Fuso -VE CRCs	7 of 30	14 of 475	8.30E-05	9.914452037	3.08171953	29.51028248	0.032787936
Mar-10	Fusobacterium-Integrated CRC genomes	Fuso +VE and Fuso -VE CRCs	7 of 30	14 of 475	8.30E-05	9.914452037	3.08171953	29.51028248	0.032787936
PCDHAC2	Fusobacterium-Integrated CRC genomes	Fuso +VE and Fuso -VE CRCs	7 of 30	14 of 475	8.30E-05	9.914452037	3.08171953	29.51028248	0.032787936
GOLGB1	Fusobacterium-Integrated CRC genomes	Fuso +VE and Fuso -VE CRCs	9 of 30	27 of 475	8.44E-05	7.056976137	2.590660333	18.0391178	0.032787936
FIP1L1	Fusobacterium-Integrated CRC genomes	Fuso +VE and Fuso -VE CRCs	6 of 30	9 of 475	9.09E-05	12.77252914	3.449780989	44.17171888	0.032787936
MEI1	Fusobacterium-Integrated CRC genomes	Fuso +VE and Fuso -VE CRCs	6 of 30	9 of 475	9.09E-05	12.77252914	3.449780989	44.17171888	0.032787936
ZRANB3	Fusobacterium-Integrated CRC genomes	Fuso +VE and Fuso -VE CRCs	6 of 30	9 of 475	9.09E-05	12.77252914	3.449780989	44.17171888	0.032787936
FBXO18	Fusobacterium-Integrated CRC genomes	Fuso +VE and Fuso -VE CRCs	6 of 30	9 of 475	9.09E-05	12.77252914	3.449780989	44.17171888	0.032787936
SLC16A1	Fusobacterium-Integrated CRC genomes	Fuso +VE and Fuso -VE CRCs	6 of 30	9 of 475	9.09E-05	12.77252914	3.449780989	44.17171888	0.032787936
HRG	Fusobacterium-Integrated CRC genomes	Fuso +VE and Fuso -VE CRCs	6 of 30	9 of 475	9.09E-05	12.77252914	3.449780989	44.17171888	0.032787936
SLC25A13	Fusobacterium-Integrated CRC genomes	Fuso +VE and Fuso -VE CRCs	6 of 30	9 of 475	9.09E-05	12.77252914	3.449780989	44.17171888	0.032787936
OLFML2B	Fusobacterium-Integrated CRC genomes	Fuso +VE and Fuso -VE CRCs	6 of 30	9 of 475	9.09E-05	12.77252914	3.449780989	44.17171888	0.032787936
UBQLN3	Fusobacterium-Integrated CRC genomes	Fuso +VE and Fuso -VE CRCs	6 of 30	9 of 475	9.09E-05	12.77252914	3.449780989	44.17171888	0.032787936
TTC12	Fusobacterium-Integrated CRC genomes	Fuso +VE and Fuso -VE CRCs	6 of 30	9 of 475	9.09E-05	12.77252914	3.449780989	44.17171888	0.032787936
ZNF829	Fusobacterium-Integrated CRC genomes	Fuso +VE and Fuso -VE CRCs	6 of 30	9 of 475	9.09E-05	12.77252914	3.449780989	44.17171888	0.032787936
COL6A6	Fusobacterium-Integrated CRC genomes	Fuso +VE and Fuso -VE CRCs	10 of 30	35 of 475	9.19E-05	6.244809538	2.415830328	15.31564602	0.032787936
NID2	Fusobacterium-Integrated CRC genomes	Fuso +VE and Fuso -VE CRCs	8 of 30	21 of 475	0.000107785	7.794893075	2.680999676	21.01764516	0.033583661
ZNF264	Fusobacterium-Integrated CRC genomes	Fuso +VE and Fuso -VE CRCs	5 of 30	5 of 475	0.000108164	18.4739788	3.978845686	86.27903345	0.033583661
ACE2	Fusobacterium-Integrated CRC genomes	Fuso +VE and Fuso -VE CRCs	5 of 30	5 of 475	0.000108164	18.4739788	3.978845686	86.27903345	0.033583661
ANGPTL5	Fusobacterium-Integrated CRC genomes	Fuso +VE and Fuso -VE CRCs	5 of 30	5 of 475	0.000108164	18.4739788	3.978845686	86.27903345	0.033583661
ARHGAP24	Fusobacterium-Integrated CRC genomes	Fuso +VE and Fuso -VE CRCs	5 of 30	5 of 475	0.000108164	18.4739788	3.978845686	86.27903345	0.033583661
SLC39A7	Fusobacterium-Integrated CRC genomes	Fuso +VE and Fuso -VE CRCs	5 of 30	5 of 475	0.000108164	18.4739788	3.978845686	86.27903345	0.033583661
TRAF3IP1	Fusobacterium-Integrated CRC genomes	Fuso +VE and Fuso -VE CRCs	5 of 30	5 of 475	0.000108164	18.4739788	3.978845686	86.27903345	0.033583661
KBTBD12	Fusobacterium-Integrated CRC genomes	Fuso +VE and Fuso -VE CRCs	5 of 30	5 of 475	0.000108164	18.4739788	3.978845686	86.27903345	0.033583661
ENG	Fusobacterium-Integrated CRC genomes	Fuso +VE and Fuso -VE CRCs	5 of 30	5 of 475	0.000108164	18.4739788	3.978845686	86.27903345	0.033583661
OR52H1	Fusobacterium-Integrated CRC genomes	Fuso +VE and Fuso -VE CRCs	5 of 30	5 of 475	0.000108164	18.4739788	3.978845686	86.27903345	0.033583661
TRAF3	Fusobacterium-Integrated CRC genomes	Fuso +VE and Fuso -VE CRCs	5 of 30	5 of 475	0.000108164	18.4739788	3.978845686	86.27903345	0.033583661
GPR84	Fusobacterium-Integrated CRC genomes	Fuso +VE and Fuso -VE CRCs	5 of 30	5 of 475	0.000108164	18.4739788	3.978845686	86.27903345	0.033583661
OR1N2	Fusobacterium-Integrated CRC genomes	Fuso +VE and Fuso -VE CRCs	5 of 30	5 of 475	0.000108164	18.4739788	3.978845686	86.27903345	0.033583661
PCSK2	Fusobacterium-Integrated CRC genomes	Fuso +VE and Fuso -VE CRCs	5 of 30	5 of 475	0.000108164	18.4739788	3.978845686	86.27903345	0.033583661
GIT1	Fusobacterium-Integrated CRC genomes	Fuso +VE and Fuso -VE CRCs	5 of 30	5 of 475	0.000108164	18.4739788	3.978845686	86.27903345	0.033583661
KIAA1033	Fusobacterium-Integrated CRC genomes	Fuso +VE and Fuso -VE CRCs	7 of 30	15 of 475	0.000116759	9.239238733	2.897709618	27.08737354	0.035698801
ASXL3	Fusobacterium-Integrated CRC genomes	Fuso +VE and Fuso -VE CRCs	7 of 30	15 of 475	0.000116759	9.239238733	2.897709618	27.08737354	0.035698801
MIER3	Fusobacterium-Integrated CRC genomes	Fuso +VE and Fuso -VE CRCs	6 of 30	10 of 475	0.000139364	11.48365046	3.159098618	38.4671344	0.036416212
GALNT5	Fusobacterium-Integrated CRC genomes	Fuso +VE and Fuso -VE CRCs	6 of 30	10 of 475	0.000139364	11.48365046	3.159098618	38.4671344	0.036416212
KCNJ8	Fusobacterium-Integrated CRC genomes	Fuso +VE and Fuso -VE CRCs	6 of 30	10 of 475	0.000139364	11.48365046	3.159098618	38.4671344	0.036416212
DCSTAMP	Fusobacterium-Integrated CRC genomes	Fuso +VE and Fuso -VE CRCs	6 of 30	10 of 475	0.000139364	11.48365046	3.159098618	38.4671344	0.036416212
STOX1	Fusobacterium-Integrated CRC genomes	Fuso +VE and Fuso -VE CRCs	6 of 30	10 of 475	0.000139364	11.48365046	3.159098618	38.4671344	0.036416212
AK5	Fusobacterium-Integrated CRC genomes	Fuso +VE and Fuso -VE CRCs	6 of 30	10 of 475	0.000139364	11.48365046	3.159098618	38.4671344	0.036416212
GALNTL5	Fusobacterium-Integrated CRC genomes	Fuso +VE and Fuso -VE CRCs	6 of 30	10 of 475	0.000139364	11.48365046	3.159098618	38.4671344	0.036416212
TTLL9	Fusobacterium-Integrated CRC genomes	Fuso +VE and Fuso -VE CRCs	6 of 30	10 of 475	0.000139364	11.48365046	3.159098618	38.4671344	0.036416212
METTL6	Fusobacterium-Integrated CRC genomes	Fuso +VE and Fuso -VE CRCs	4 of 30	2 of 475	0.00014103	35.53666266	4.846227826	407.6592174	0.036416212
CHAF1B	Fusobacterium-Integrated CRC genomes	Fuso +VE and Fuso -VE CRCs	4 of 30	2 of 475	0.00014103	35.53666266	4.846227826	407.6592174	0.036416212
ALDH1B1	Fusobacterium-Integrated CRC genomes	Fuso +VE and Fuso -VE CRCs	4 of 30	2 of 475	0.00014103	35.53666266	4.846227826	407.6592174	0.036416212
LETMD1	Fusobacterium-Integrated CRC genomes	Fuso +VE and Fuso -VE CRCs	4 of 30	2 of 475	0.00014103	35.53666266	4.846227826	407.6592174	0.036416212
SETMAR	Fusobacterium-Integrated CRC genomes	Fuso +VE and Fuso -VE CRCs	4 of 30	2 of 475	0.00014103	35.53666266	4.846227826	407.6592174	0.036416212
ZBTB32	Fusobacterium-Integrated CRC genomes	Fuso +VE and Fuso -VE CRCs	4 of 30	2 of 475	0.00014103	35.53666266	4.846227826	407.6592174	0.036416212
HHLA2	Fusobacterium-Integrated CRC genomes	Fuso +VE and Fuso -VE CRCs	4 of 30	2 of 475	0.00014103	35.53666266	4.846227826	407.6592174	0.036416212
CTHRC1	Fusobacterium-Integrated CRC genomes	Fuso +VE and Fuso -VE CRCs	4 of 30	2 of 475	0.00014103	35.53666266	4.846227826	407.6592174	0.036416212
SLC22A23	Fusobacterium-Integrated CRC genomes	Fuso +VE and Fuso -VE CRCs	4 of 30	2 of 475	0.00014103	35.53666266	4.846227826	407.6592174	0.036416212
UTP15	Fusobacterium-Integrated CRC genomes	Fuso +VE and Fuso -VE CRCs	4 of 30	2 of 475	0.00014103	35.53666266	4.846227826	407.6592174	0.036416212
MDGA2	Fusobacterium-Integrated CRC genomes	Fuso +VE and Fuso -VE CRCs	8 of 30	22 of 475	0.000141042	7.427092088	2.566092333	19.89707417	0.036416212
TP53BP1	Fusobacterium-Integrated CRC genomes	Fuso +VE and Fuso -VE CRCs	8 of 30	22 of 475	0.000141042	7.427092088	2.566092333	19.89707417	0.036416212
FAM194A	Fusobacterium-Integrated CRC genomes	Fuso +VE and Fuso -VE CRCs	7 of 30	16 of 475	0.000160949	8.647980516	2.733991701	25.07377212	0.039549112
GRIK4	Fusobacterium-Integrated CRC genomes	Fuso +VE and Fuso -VE CRCs	7 of 30	16 of 475	0.000160949	8.647980516	2.733991701	25.07377212	0.039549112
CCDC144A	Fusobacterium-Integrated CRC genomes	Fuso +VE and Fuso -VE CRCs	7 of 30	16 of 475	0.000160949	8.647980516	2.733991701	25.07377212	0.039549112
ALK	Fusobacterium-Integrated CRC genomes	Fuso +VE and Fuso -VE CRCs	8 of 30	23 of 475	0.000182412	7.08923356	2.46029982	18.88552791	0.042049115
ULK2	Fusobacterium-Integrated CRC genomes	Fuso +VE and Fuso -VE CRCs	8 of 30	23 of 475	0.000182412	7.08923356	2.46029982	18.88552791	0.042049115
SLC4A1AP	Fusobacterium-Integrated CRC genomes	Fuso +VE and Fuso -VE CRCs	5 of 30	6 of 475	0.00019002	15.39543431	3.4701412	65.31332558	0.042049115
STK3	Fusobacterium-Integrated CRC genomes	Fuso +VE and Fuso -VE CRCs	5 of 30	6 of 475	0.00019002	15.39543431	3.4701412	65.31332558	0.042049115
SFPQ	Fusobacterium-Integrated CRC genomes	Fuso +VE and Fuso -VE CRCs	5 of 30	6 of 475	0.00019002	15.39543431	3.4701412	65.31332558	0.042049115
PLRG1	Fusobacterium-Integrated CRC genomes	Fuso +VE and Fuso -VE CRCs	5 of 30	6 of 475	0.00019002	15.39543431	3.4701412	65.31332558	0.042049115
GLP2R	Fusobacterium-Integrated CRC genomes	Fuso +VE and Fuso -VE CRCs	5 of 30	6 of 475	0.00019002	15.39543431	3.4701412	65.31332558	0.042049115
MR1	Fusobacterium-Integrated CRC genomes	Fuso +VE and Fuso -VE CRCs	5 of 30	6 of 475	0.00019002	15.39543431	3.4701412	65.31332558	0.042049115
ZNF484	Fusobacterium-Integrated CRC genomes	Fuso +VE and Fuso -VE CRCs	5 of 30	6 of 475	0.00019002	15.39543431	3.4701412	65.31332558	0.042049115
SLC38A11	Fusobacterium-Integrated CRC genomes	Fuso +VE and Fuso -VE CRCs	5 of 30	6 of 475	0.00019002	15.39543431	3.4701412	65.31332558	0.042049115
TBCCD1	Fusobacterium-Integrated CRC genomes	Fuso +VE and Fuso -VE CRCs	5 of 30	6 of 475	0.00019002	15.39543431	3.4701412	65.31332558	0.042049115
CLDN10	Fusobacterium-Integrated CRC genomes	Fuso +VE and Fuso -VE CRCs	5 of 30	6 of 475	0.00019002	15.39543431	3.4701412	65.31332558	0.042049115
SEC23IP	Fusobacterium-Integrated CRC genomes	Fuso +VE and Fuso -VE CRCs	5 of 30	6 of 475	0.00019002	15.39543431	3.4701412	65.31332558	0.042049115
EXOC2	Fusobacterium-Integrated CRC genomes	Fuso +VE and Fuso -VE CRCs	5 of 30	6 of 475	0.00019002	15.39543431	3.4701412	65.31332558	0.042049115
CATSPER2	Fusobacterium-Integrated CRC genomes	Fuso +VE and Fuso -VE CRCs	5 of 30	6 of 475	0.00019002	15.39543431	3.4701412	65.31332558	0.042049115
ASPA	Fusobacterium-Integrated CRC genomes	Fuso +VE and Fuso -VE CRCs	5 of 30	6 of 475	0.00019002	15.39543431	3.4701412	65.31332558	0.042049115
SLCO2B1	Fusobacterium-Integrated CRC genomes	Fuso +VE and Fuso -VE CRCs	5 of 30	6 of 475	0.00019002	15.39543431	3.4701412	65.31332558	0.042049115
TYRO3	Fusobacterium-Integrated CRC genomes	Fuso +VE and Fuso -VE CRCs	5 of 30	6 of 475	0.00019002	15.39543431	3.4701412	65.31332558	0.042049115
XIRP2	Fusobacterium-Integrated CRC genomes	Fuso +VE and Fuso -VE CRCs	13 of 30	67 of 475	0.000194435	4.635944947	1.973479993	10.67413321	0.042789692
AXL	Fusobacterium-Integrated CRC genomes	Fuso +VE and Fuso -VE CRCs	6 of 30	11 of 475	0.000206431	10.42603688	2.912927708	34.01795075	0.043746955
TLL2	Fusobacterium-Integrated CRC genomes	Fuso +VE and Fuso -VE CRCs	6 of 30	11 of 475	0.000206431	10.42603688	2.912927708	34.01795075	0.043746955
ACSBG2	Fusobacterium-Integrated CRC genomes	Fuso +VE and Fuso -VE CRCs	6 of 30	11 of 475	0.000206431	10.42603688	2.912927708	34.01795075	0.043746955
ZNF347	Fusobacterium-Integrated CRC genomes	Fuso +VE and Fuso -VE CRCs	6 of 30	11 of 475	0.000206431	10.42603688	2.912927708	34.01795075	0.043746955
EXOC1	Fusobacterium-Integrated CRC genomes	Fuso +VE and Fuso -VE CRCs	6 of 30	11 of 475	0.000206431	10.42603688	2.912927708	34.01795075	0.043746955
ZNF709	Fusobacterium-Integrated CRC genomes	Fuso +VE and Fuso -VE CRCs	6 of 30	11 of 475	0.000206431	10.42603688	2.912927708	34.01795075	0.043746955
ALS2	Fusobacterium-Integrated CRC genomes	Fuso +VE and Fuso -VE CRCs	7 of 30	17 of 475	0.000217884	8.12589957	2.587000847	23.28880574	0.044983982
DEPDC5	Fusobacterium-Integrated CRC genomes	Fuso +VE and Fuso -VE CRCs	7 of 30	17 of 475	0.000217884	8.12589957	2.587000847	23.28880574	0.044983982
SLC4A4	Fusobacterium-Integrated CRC genomes	Fuso +VE and Fuso -VE CRCs	7 of 30	17 of 475	0.000217884	8.12589957	2.587000847	23.28880574	0.044983982
SLC26A3	Fusobacterium-Integrated CRC genomes	Fuso +VE and Fuso -VE CRCs	7 of 30	17 of 475	0.000217884	8.12589957	2.587000847	23.28880574	0.044983982
STAB2	Fusobacterium-Integrated CRC genomes	Fuso +VE and Fuso -VE CRCs	8 of 30	24 of 475	0.000233368	6.781615738	2.362071231	17.96836725	0.045391967
SLITRK1	Fusobacterium-Integrated CRC genomes	Fuso +VE and Fuso -VE CRCs	8 of 30	24 of 475	0.000233368	6.781615738	2.362071231	17.96836725	0.045391967
MBD5	Fusobacterium-Integrated CRC genomes	Fuso +VE and Fuso -VE CRCs	8 of 30	24 of 475	0.000233368	6.781615738	2.362071231	17.96836725	0.045391967
MKI67	Fusobacterium-Integrated CRC genomes	Fuso +VE and Fuso -VE CRCs	10 of 30	40 of 475	0.000242727	5.405940594	2.109404695	13.12280539	0.045391967
DENND2C	Fusobacterium-Integrated CRC genomes	Fuso +VE and Fuso -VE CRCs	7 of 30	18 of 475	0.000290166	7.661481961	2.454625391	21.762011	0.045391967
HEATR5B	Fusobacterium-Integrated CRC genomes	Fuso +VE and Fuso -VE CRCs	7 of 30	18 of 475	0.000290166	7.661481961	2.454625391	21.762011	0.045391967
COL15A1	Fusobacterium-Integrated CRC genomes	Fuso +VE and Fuso -VE CRCs	7 of 30	18 of 475	0.000290166	7.661481961	2.454625391	21.762011	0.045391967
PLEKHH2	Fusobacterium-Integrated CRC genomes	Fuso +VE and Fuso -VE CRCs	7 of 30	18 of 475	0.000290166	7.661481961	2.454625391	21.762011	0.045391967
SLITRK6	Fusobacterium-Integrated CRC genomes	Fuso +VE and Fuso -VE CRCs	7 of 30	18 of 475	0.000290166	7.661481961	2.454625391	21.762011	0.045391967
MCM3AP	Fusobacterium-Integrated CRC genomes	Fuso +VE and Fuso -VE CRCs	7 of 30	18 of 475	0.000290166	7.661481961	2.454625391	21.762011	0.045391967
ROBO3	Fusobacterium-Integrated CRC genomes	Fuso +VE and Fuso -VE CRCs	7 of 30	18 of 475	0.000290166	7.661481961	2.454625391	21.762011	0.045391967
SEC16A	Fusobacterium-Integrated CRC genomes	Fuso +VE and Fuso -VE CRCs	8 of 30	25 of 475	0.000295559	6.498221736	2.271273645	17.13324427	0.045391967
JMJD1C	Fusobacterium-Integrated CRC genomes	Fuso +VE and Fuso -VE CRCs	8 of 30	25 of 475	0.000295559	6.498221736	2.271273645	17.13324427	0.045391967
ANKRD30B	Fusobacterium-Integrated CRC genomes	Fuso +VE and Fuso -VE CRCs	8 of 30	25 of 475	0.000295559	6.498221736	2.271273645	17.13324427	0.045391967
SEZ6L2	Fusobacterium-Integrated CRC genomes	Fuso +VE and Fuso -VE CRCs	6 of 30	12 of 475	0.000296769	9.544249393	2.701848735	30.46304713	0.045391967
ZNF721	Fusobacterium-Integrated CRC genomes	Fuso +VE and Fuso -VE CRCs	6 of 30	12 of 475	0.000296769	9.544249393	2.701848735	30.46304713	0.045391967
OTOA	Fusobacterium-Integrated CRC genomes	Fuso +VE and Fuso -VE CRCs	6 of 30	12 of 475	0.000296769	9.544249393	2.701848735	30.46304713	0.045391967
SLCO5A1	Fusobacterium-Integrated CRC genomes	Fuso +VE and Fuso -VE CRCs	6 of 30	12 of 475	0.000296769	9.544249393	2.701848735	30.46304713	0.045391967
ACSM1	Fusobacterium-Integrated CRC genomes	Fuso +VE and Fuso -VE CRCs	6 of 30	12 of 475	0.000296769	9.544249393	2.701848735	30.46304713	0.045391967
SIK3	Fusobacterium-Integrated CRC genomes	Fuso +VE and Fuso -VE CRCs	6 of 30	12 of 475	0.000296769	9.544249393	2.701848735	30.46304713	0.045391967
PDYN	Fusobacterium-Integrated CRC genomes	Fuso +VE and Fuso -VE CRCs	6 of 30	12 of 475	0.000296769	9.544249393	2.701848735	30.46304713	0.045391967
PCDHGC4	Fusobacterium-Integrated CRC genomes	Fuso +VE and Fuso -VE CRCs	5 of 30	7 of 475	0.000312142	13.18757116	3.076344859	52.34110043	0.045391967
STT3B	Fusobacterium-Integrated CRC genomes	Fuso +VE and Fuso -VE CRCs	5 of 30	7 of 475	0.000312142	13.18757116	3.076344859	52.34110043	0.045391967
TLR1	Fusobacterium-Integrated CRC genomes	Fuso +VE and Fuso -VE CRCs	5 of 30	7 of 475	0.000312142	13.18757116	3.076344859	52.34110043	0.045391967
ZIM3	Fusobacterium-Integrated CRC genomes	Fuso +VE and Fuso -VE CRCs	5 of 30	7 of 475	0.000312142	13.18757116	3.076344859	52.34110043	0.045391967
SMG5	Fusobacterium-Integrated CRC genomes	Fuso +VE and Fuso -VE CRCs	5 of 30	7 of 475	0.000312142	13.18757116	3.076344859	52.34110043	0.045391967
UBXN4	Fusobacterium-Integrated CRC genomes	Fuso +VE and Fuso -VE CRCs	5 of 30	7 of 475	0.000312142	13.18757116	3.076344859	52.34110043	0.045391967
EFTUD2	Fusobacterium-Integrated CRC genomes	Fuso +VE and Fuso -VE CRCs	5 of 30	7 of 475	0.000312142	13.18757116	3.076344859	52.34110043	0.045391967
OR10H1	Fusobacterium-Integrated CRC genomes	Fuso +VE and Fuso -VE CRCs	5 of 30	7 of 475	0.000312142	13.18757116	3.076344859	52.34110043	0.045391967
ZNF529	Fusobacterium-Integrated CRC genomes	Fuso +VE and Fuso -VE CRCs	5 of 30	7 of 475	0.000312142	13.18757116	3.076344859	52.34110043	0.045391967
SYT4	Fusobacterium-Integrated CRC genomes	Fuso +VE and Fuso -VE CRCs	5 of 30	7 of 475	0.000312142	13.18757116	3.076344859	52.34110043	0.045391967
ZNF491	Fusobacterium-Integrated CRC genomes	Fuso +VE and Fuso -VE CRCs	5 of 30	7 of 475	0.000312142	13.18757116	3.076344859	52.34110043	0.045391967
OR8H1	Fusobacterium-Integrated CRC genomes	Fuso +VE and Fuso -VE CRCs	5 of 30	7 of 475	0.000312142	13.18757116	3.076344859	52.34110043	0.045391967
GBP3	Fusobacterium-Integrated CRC genomes	Fuso +VE and Fuso -VE CRCs	5 of 30	7 of 475	0.000312142	13.18757116	3.076344859	52.34110043	0.045391967
SOX11	Fusobacterium-Integrated CRC genomes	Fuso +VE and Fuso -VE CRCs	5 of 30	7 of 475	0.000312142	13.18757116	3.076344859	52.34110043	0.045391967
CLEC1A	Fusobacterium-Integrated CRC genomes	Fuso +VE and Fuso -VE CRCs	5 of 30	7 of 475	0.000312142	13.18757116	3.076344859	52.34110043	0.045391967
WDR91	Fusobacterium-Integrated CRC genomes	Fuso +VE and Fuso -VE CRCs	5 of 30	7 of 475	0.000312142	13.18757116	3.076344859	52.34110043	0.045391967
CLUAP1	Fusobacterium-Integrated CRC genomes	Fuso +VE and Fuso -VE CRCs	5 of 30	7 of 475	0.000312142	13.18757116	3.076344859	52.34110043	0.045391967
ITGB5	Fusobacterium-Integrated CRC genomes	Fuso +VE and Fuso -VE CRCs	4 of 30	3 of 475	0.000315412	23.7333221	3.805281565	170.678693	0.045391967
BTBD9	Fusobacterium-Integrated CRC genomes	Fuso +VE and Fuso -VE CRCs	4 of 30	3 of 475	0.000315412	23.7333221	3.805281565	170.678693	0.045391967
SECISBP2	Fusobacterium-Integrated CRC genomes	Fuso +VE and Fuso -VE CRCs	4 of 30	3 of 475	0.000315412	23.7333221	3.805281565	170.678693	0.045391967
TRIM23	Fusobacterium-Integrated CRC genomes	Fuso +VE and Fuso -VE CRCs	4 of 30	3 of 475	0.000315412	23.7333221	3.805281565	170.678693	0.045391967
GPAM	Fusobacterium-Integrated CRC genomes	Fuso +VE and Fuso -VE CRCs	4 of 30	3 of 475	0.000315412	23.7333221	3.805281565	170.678693	0.045391967
PTPN22	Fusobacterium-Integrated CRC genomes	Fuso +VE and Fuso -VE CRCs	4 of 30	3 of 475	0.000315412	23.7333221	3.805281565	170.678693	0.045391967
GALNT8	Fusobacterium-Integrated CRC genomes	Fuso +VE and Fuso -VE CRCs	4 of 30	3 of 475	0.000315412	23.7333221	3.805281565	170.678693	0.045391967
KERA	Fusobacterium-Integrated CRC genomes	Fuso +VE and Fuso -VE CRCs	4 of 30	3 of 475	0.000315412	23.7333221	3.805281565	170.678693	0.045391967
MTERFD1	Fusobacterium-Integrated CRC genomes	Fuso +VE and Fuso -VE CRCs	4 of 30	3 of 475	0.000315412	23.7333221	3.805281565	170.678693	0.045391967
ZC3H14	Fusobacterium-Integrated CRC genomes	Fuso +VE and Fuso -VE CRCs	4 of 30	3 of 475	0.000315412	23.7333221	3.805281565	170.678693	0.045391967
OR2B6	Fusobacterium-Integrated CRC genomes	Fuso +VE and Fuso -VE CRCs	4 of 30	3 of 475	0.000315412	23.7333221	3.805281565	170.678693	0.045391967
CD37	Fusobacterium-Integrated CRC genomes	Fuso +VE and Fuso -VE CRCs	4 of 30	3 of 475	0.000315412	23.7333221	3.805281565	170.678693	0.045391967
ENTPD3	Fusobacterium-Integrated CRC genomes	Fuso +VE and Fuso -VE CRCs	4 of 30	3 of 475	0.000315412	23.7333221	3.805281565	170.678693	0.045391967
PLAUR	Fusobacterium-Integrated CRC genomes	Fuso +VE and Fuso -VE CRCs	4 of 30	3 of 475	0.000315412	23.7333221	3.805281565	170.678693	0.045391967
NDEL1	Fusobacterium-Integrated CRC genomes	Fuso +VE and Fuso -VE CRCs	4 of 30	3 of 475	0.000315412	23.7333221	3.805281565	170.678693	0.045391967
CLEC7A	Fusobacterium-Integrated CRC genomes	Fuso +VE and Fuso -VE CRCs	4 of 30	3 of 475	0.000315412	23.7333221	3.805281565	170.678693	0.045391967
ERO1L	Fusobacterium-Integrated CRC genomes	Fuso +VE and Fuso -VE CRCs	4 of 30	3 of 475	0.000315412	23.7333221	3.805281565	170.678693	0.045391967
FOXC1	Fusobacterium-Integrated CRC genomes	Fuso +VE and Fuso -VE CRCs	4 of 30	3 of 475	0.000315412	23.7333221	3.805281565	170.678693	0.045391967
GOPC	Fusobacterium-Integrated CRC genomes	Fuso +VE and Fuso -VE CRCs	4 of 30	3 of 475	0.000315412	23.7333221	3.805281565	170.678693	0.045391967
PGLYRP4	Fusobacterium-Integrated CRC genomes	Fuso +VE and Fuso -VE CRCs	4 of 30	3 of 475	0.000315412	23.7333221	3.805281565	170.678693	0.045391967
RPIA	Fusobacterium-Integrated CRC genomes	Fuso +VE and Fuso -VE CRCs	4 of 30	3 of 475	0.000315412	23.7333221	3.805281565	170.678693	0.045391967
TTC39B	Fusobacterium-Integrated CRC genomes	Fuso +VE and Fuso -VE CRCs	4 of 30	3 of 475	0.000315412	23.7333221	3.805281565	170.678693	0.045391967
OR5AK2	Fusobacterium-Integrated CRC genomes	Fuso +VE and Fuso -VE CRCs	4 of 30	3 of 475	0.000315412	23.7333221	3.805281565	170.678693	0.045391967
KLRF1	Fusobacterium-Integrated CRC genomes	Fuso +VE and Fuso -VE CRCs	4 of 30	3 of 475	0.000315412	23.7333221	3.805281565	170.678693	0.045391967
OR5B21	Fusobacterium-Integrated CRC genomes	Fuso +VE and Fuso -VE CRCs	4 of 30	3 of 475	0.000315412	23.7333221	3.805281565	170.678693	0.045391967
BCCIP	Fusobacterium-Integrated CRC genomes	Fuso +VE and Fuso -VE CRCs	4 of 30	3 of 475	0.000315412	23.7333221	3.805281565	170.678693	0.045391967
DCK	Fusobacterium-Integrated CRC genomes	Fuso +VE and Fuso -VE CRCs	4 of 30	3 of 475	0.000315412	23.7333221	3.805281565	170.678693	0.045391967
DNAJB14	Fusobacterium-Integrated CRC genomes	Fuso +VE and Fuso -VE CRCs	4 of 30	3 of 475	0.000315412	23.7333221	3.805281565	170.678693	0.045391967
HRSP12	Fusobacterium-Integrated CRC genomes	Fuso +VE and Fuso -VE CRCs	4 of 30	3 of 475	0.000315412	23.7333221	3.805281565	170.678693	0.045391967
POLR2M	Fusobacterium-Integrated CRC genomes	Fuso +VE and Fuso -VE CRCs	4 of 30	3 of 475	0.000315412	23.7333221	3.805281565	170.678693	0.045391967
DNAH8	Fusobacterium-Integrated CRC genomes	Fuso +VE and Fuso -VE CRCs	12 of 30	61 of 475	0.000348911	4.50444033	1.880804827	10.45540878	0.049732865
